# Supplementary material for: Genome-wide identification of bZIP transcription factors and their expression analysis in Platycodon grandiflorus under abiotic stress
Source: Front Plant Sci. 2024 May 28;15:1403220. doi: 10.3389/fpls.2024.1403220 (PMC11165138; doi:10.3389/fpls.2024.1403220)
Supplement: Supplementary file 1 [file Table_1.xlsx]

## Sheet: Sheet1
The list of 47 PgbZIP genes identified in this article
gene ID	Rename	Theoretical pI	Molecular weight	Number of amino acids	Grand average of hydropathicity (GRAVY)
Pg_chr01_03120T	PgbZIP1	6.04	38726.4	350	-0.707
Pg_chr01_13470T	PgbZIP2	5.75	38693.6	354	-0.786
Pg_chr01_24060T	PgbZIP3	5.68	22790.3	196	-0.911
Pg_chr01_36170T	PgbZIP4	5.91	42476.8	396	-0.824
Pg_chr02_21840T	PgbZIP5	6.51	19276.5	169	-0.934
Pg_chr02_24710T	PgbZIP6	9.43	46999.8	432	-0.65
Pg_chr02_26970T	PgbZIP7	9.46	16504.9	139	-0.835
Pg_chr02_36690T	PgbZIP8	5.94	39123.3	362	-0.623
Pg_chr02_45810T	PgbZIP9	6.07	18765.7	160	-1.014
Pg_chr02_45820T	PgbZIP10	6.06	22471	195	-0.772
Pg_chr02_48740T	PgbZIP11	6.77	45081.9	411	-0.392
Pg_chr03_05930T	PgbZIP12	6.98	59626.8	529	-0.753
Pg_chr03_13860T	PgbZIP13	5.61	75818.8	704	-0.471
Pg_chr03_14590T	PgbZIP14	9.28	35921.3	324	-0.821
Pg_chr03_15470T	PgbZIP15	9.04	49529.5	449	-0.618
Pg_chr03_18510T	PgbZIP16	9.13	43720.7	391	-0.444
Pg_chr03_23670T	PgbZIP17	7.62	47082.6	426	-0.773
Pg_chr03_24210T	PgbZIP18	8.63	47560.3	428	-0.469
Pg_chr03_29870T	PgbZIP19	9.42	47421.4	432	-0.692
Pg_chr03_41000T	PgbZIP20	5.42	33896.5	302	-0.861
Pg_chr04_13120T	PgbZIP21	6.18	43621.7	411	-0.943
Pg_chr04_14910T	PgbZIP22	8.67	28110.6	243	-0.91
Pg_chr04_14920T	PgbZIP23	6.55	33688.9	297	-0.433
Pg_chr04_16600T	PgbZIP24	8.54	33560.9	302	-0.57
Pg_chr04_17120T	PgbZIP25	6.88	38816.9	351	-0.915
Pg_chr04_24190T	PgbZIP26	7.77	44873.3	404	-0.903
Pg_chr04_44620T	PgbZIP27	9.77	30562.6	279	-0.543
Pg_chr04_47570T	PgbZIP28	4.66	34494.8	306	-0.559
Pg_chr05_11720T	PgbZIP29	6.1	30914.7	285	-0.588
Pg_chr05_24330T	PgbZIP30	8.47	34007.9	312	-0.741
Pg_chr05_25760T	PgbZIP31	6.13	36067.2	322	-0.749
Pg_chr05_35190T	PgbZIP32	7.24	68310.1	627	-0.686
Pg_chr06_01830T	PgbZIP33	5.63	16888.2	147	-0.72
Pg_chr06_14230T	PgbZIP34	6.57	40895.6	372	-0.617
Pg_chr06_15840T	PgbZIP35	5.17	30252	273	-0.613
Pg_chr06_27120T	PgbZIP36	6.02	57301	521	-0.51
Pg_chr06_27140T	PgbZIP37	5.87	41983.4	373	-0.648
Pg_chr07_00550T	PgbZIP38	6.47	39948.5	349	-0.482
Pg_chr07_19130T	PgbZIP39	7.86	17394.8	145	-0.971
Pg_chr07_26570T	PgbZIP40	9.51	14840.5	132	-1.243
Pg_chr07_29960T	PgbZIP41	7.89	22239.2	197	-0.602
Pg_chr08_00320T	PgbZIP42	5.99	29222.6	269	-0.722
Pg_chr08_24200T	PgbZIP43	4.8	41769.1	376	-0.676
Pg_chr08_31010T	PgbZIP44	6.85	43046.5	404	-0.814
Pg_chr09_28610T	PgbZIP45	5.88	35920	331	-0.696
Pg_contig00116_02430T	PgbZIP46	7.88	18389.6	160	-0.691
Pg_contig01856_00120T	PgbZIP47	5.97	24260.4	216	-0.395
