# Supplementary material for: Genome-wide identification of bZIP transcription factors and their expression analysis in Platycodon grandiflorus under abiotic stress
Source: Front Plant Sci. 2024 May 28;15:1403220. doi: 10.3389/fpls.2024.1403220 (PMC11165138; doi:10.3389/fpls.2024.1403220)
Supplement: Supplementary file 2 [file Table_2.xlsx]

## Sheet: Sheet1
Phylogenetic analysis of PgbZIP protein
>PgbZIP3
MQTSEVAELHYLVPPNPTPYPAHFSLTQNNIPTFQFSRISNPLYSLQITPQIQEFTPQPTCFSSNSTSDEGDEQQLSIINERKQRRMISNRESARRSRMRKQKHLDELWSQVVWLRNENHQLVDKLNNFSETHDRVRQENAQLKEEASELRQMLTDMQLNSPYPTLRNLDDIHCNTAYLGTESSNQSITSSSDVLP*
>PgbZIP4
MGAGEESSPAKHAKPTLSPQEIPTPPSYPDWSSSMQAYYGAGGTPPFFASTVASPTPHPYMWGGQHPLMPPYGTPVPYPALYPPAGVYAHPSMATTPSTAPANAELEGKVPEGKERPPTKKSKGTSGNANHIGGRAGESAKAASSSGNDGATQSAESGSDGSSDASDENNDRNDIHGNKKGSFHQMLAEATAQNNTSGPNLQTSVPGNPVVSVPATNLNMGMDLWNASAGSGAMKGRPNAVVGRDGMMPDQWVQSIMISLLYLDVVWVAGGTPEGWPSGYAWGFGFTERQSTWRWSSGFTEHEQDERELKRQKRKQSNRESARRSRLRKQAECEELQTRVESLSSENHTLRDELRRLSEECEKLTSENNTIKGELTRICGPEAVSKLESNSMLGNS*
>PgbZIP2
MQDPSNPNPKPPNAAPPSSFPTPPATSFRPSHHRRAHSEMNFRLPDDLDLVSDPFDAPSGSFEEIGSEDDLFCTYMDIEKLGSNLNDGGLDCRIDNAGGGSGGAGEEIGGDGEKSMRPRHRHSNSVDSSSLFGSESIEAKKAMAPDKLAELWTVDPKRAKRILANRQSAARSKERKARYINELERKVQTLQTEATTLSAQLTLFQRDTTGLSSENTELKLRLQAMEQQAHLRDALNEALKQEVERLRIATGEMSGGSDAYSLGMHHVTYNQSAFFSNQQQQPDQPQFHALQSNMSGHHHHPLLAAAHAQVLSESLQQQDPLGRFQGLDIGSRGSSHLVKSEGPSISASESSSTF*
>PgbZIP1
MGKSEESSYVKMESVSPPRQELRDIHLYPDWATIQAFYSHGVPLQQPYFNPGVSDGHVPPHARLWTPPQPLIPLYGLPYPAVYSQGVVYAHPALPLVSNPSSKESLSNSSDKIDHGSTKKLRRLDGIALPVGNDCAQVDTEASVHEVSQSVGTDASSDGSDGKSGAHQSRQRSNSTEACGKVNVQANAVPEYCVEAPVAPKILRHNPVHIPNGKAEPNLVCANEGLPFEVRVQEERHLKRERRKQANRESARRSRLRKQAEFEGLMERYESMKVENMALKSEVNQLIEDSEKVKLENAALMDKLNNAETGQPMTLAEDQTVSNSIRPKSSDELCELNNLCSVQVKEEKGF*
>PgbZIP5
MATSSGNSSGSTQLPNSGSEGDLQVGMDQRKRKRMQSNRESARRSRMRKQKHLDDLMAQVAQLRKDNSQIHTTTSITTQQFLTVEAENSVLRAQMMELSQRLESLNDILNYMNTNHGIFETEPQQQQQQDHHLTGPGLGIGPDNFMNNPWNMMYINQQPIMASADMFQY*
>PgbZIP7
MMSCIEPVHCQFTPDEIHELLSLFQQADSPLNSTSGSEVNRSVYSMEERKRRRMISNRESARRSRQRKKRHLEKLTDQLNHLKVENRELRNRLCLLGQQCHYVFSETDRLRSEYMHLQIKLSGLSQILVAMQQLQSHQP*
>PgbZIP8
MDKKPILHNNPSIFAGGVMNRSASDLALEELFKHSSNVPDVVSGRDDHKISEIIRSQRVAGVFAGTDGLFGADDDDVCSADLTYPYRNQELMNGFPSCGGLTGAPLWSPNLTPKNNSSISVTIDSQSSICAGSPTSAITKPKGQDNQATGATSGSSHEQSDDDDIDTEAGPCEQSTDQIDVKRIKRMVSNRESARRSRRRKQAHLAELEQQVDHLRGEKSSLFKQLTDADQQLKDATTNNRVLKSDVEALRAKVKLAEDMVARGSLTSSLSHLLQNHLNTPQTFSNQNMYRMGSVSPTITVRGDHHSTSHPGLLPVSGQHSTVGLENANMFNSIGKNGIISDGGSCASDIWPWESQLPTVSK*
>PgbZIP10
MLPEIAANYCLAPENLSPFPNNFTSVQNNISSLHFSSFMSNLPYFQTSPPVLDFSPQSSSLSNNSTSDEAEEHQLNIIDERKQRRMISNRESARRSRMRKQKHLDELWSQVVRLRTENHNLIDKLNHASESHERVLKENAQLKEEASDLRQMLNEVQLARTYTALRDLDEVPCTTAHLRAEFSNQSMTASSNMLH*
>PgbZIP6
MNMNFKNFGNERLQMDGGVGSGQPPGNFPLVRQGSIYSLTFDELQSTMGSVGKDFGSMNMDELLKNIWNAEETQTMGNNTSGAQDRGVPGGHLQRQGSLTLPRTLSQKTVDEVWKDIAKEYNSGFGESSFQQQRQQTLGEMTLEEFLVKAGVVWEETQVAGKPIDTGLFGNLPNSQNNSSFGIGFQQPIRNTGVMGNRIPENGNGIAFQSANLPLSVNGVRSTQQHQSQMQQQQQQSQQQQLFPKQPTLAYGAPMPIPSNSQLASPGIRGGIMGHSDPVMNGNLVSSAALQGGGLGVVSLGGGAVTVANGSPALSSDGIGKSNGDTSSVSPAPYVFNGVLRGRKCSAVEKVVERRQRRMIKNRESAARSRARKQAYTMELEAEVAKLKEQNQELLKKQE…
>PgbZIP9
MLPEMAAFNYLAHQNQSPFPANFNTIQSNFSGYYQTSHPVIDFTPPQYSSSLSNNSSTSDEAEENQINSIIDERKRRRMISNRESARRSRMRKQRQLDELWSQVVHLRNEYHDLMDKFNHVSESHDRVVKENEALKEETKDLRNMITEVQLGSDSSTLLR*
>PgbZIP11
MKQGNVVVSNNLQFGQNTNFSSATEMGTRGTGVDSGQFMMHKGSAAAAAAPLTMVVVGGGGGGGSLGNEHFENWGDSGMADNSQQTDTSTDVDTEDKNQFHGVRQGSLVAVDSMDRSTGKMGDQKVLRRLAQNREAARKSRLRKKAYVQQLENSRLRLTQLEQELKRARQQGMFVSTGVSGDQSQSVVGNGAVAFDMDYARWLDEQQRLVNDLRSAVNSHVGDNELRLLVDGVMSHYDEIFRLKSIAAKSDVFHMLSGMWKTPAERCFMWLGGFRSSELLKILGSHLEPLTDQQLMGICNLQQSSQQAEDALSQGMEALQQSLVETLSSNAITLAGSGNVADYMGQMAIAMGKLATLENFLHQADLLRQQTLQQMHRILTTRQAARALLVISDYMSRLR…
>PgbZIP17
MVVPESEMTSQGEVESQLQSDQQHSRNNVFPLLGRQSSIYSLTLDEFQHTLCESGKNFGSMNMDEFLNSIWTAEENQVHAQAQGTTCTTLSTVMAHNNNQPQFSMGLSTSAEKTSIVRQPSLHKQGSLTLPGPLSHKTVDEVWSEIQKTQHEQQQSSNTNNKQNSGSTQSQPTYGEMTLEDFLVKAGVVREQGQPVQPIQQQPFGLYQDSNNCVGGPGHMARPIMGLGGGSVSVPPYPPQQTIVGEPSGYVGIGKRGGGYQPPTSCYGSRVGNGGGARFRDWIPVSPVSSDGMCGSQVDSGNQYGLDMGGIRGGRKRIIDGPVEKVVERRQRRMIKNRESAARSRARKQAYTVELEAELNQLKEENAQLRQALAELERKRNQQIWCNLMELSQEEYFDE…
>PgbZIP19
MGSYINFKNFGDTSQSDAHSNRLVANSPLARQSSIYSLTFDELQNTLGGVGKDFGSMNMDELLKNIWTAEETQANTSSTYGVEGSVPGGNLQRQGSLTLPRTLSQKTVDEVWRELFKESVGGVKDGSAIGESNIEQRQQTLGEMTLEEFLHRAGVVGEGNQPNGRPQNGGFYGDISQQNTNSTSLMFGFQQAPQNHGSLTSQIPQNDNAVHNTTPNLGLNLHGIRLSQQQLQKQPQLHPQPLFPKQATVAFASPMGVLNNGQLGSPGTRVSIVGKTDPMNTSLVQGTGIENGTMGMTFLTGAKMMSAGSPRSQLPVNLIPKSTLDTSSSSPSNTYDEPVRGRRSGGPLEKVVERRRRRMIKNRESAARSRARKQAYTLELEAEVAKLKEVNYELQKKQE…
>PgbZIP13
MADTTLADPMMILPPNNDDFDPLPIPPLDPSIFSDDFHLSDNNFLSFDDQDFDITFDDLYLPSDTEEFLNLGTNPTQLASDPESGCVNEYVSDPESGGDRVLNSESGRVSDDPDVAGFLNIPSQESGDKSLSFPSPESGNNNPVSSQGSGDCGSAVSCSEGLNYPSPDSSNSANNSINEVVDQKVKEEDLGNSSLLKRKKENGDSNSESRNSKYRRSNAASESANQSSGLNDEDEKKKARLIRNRESAQLSRQRKKHYVEELEDKVRAMHSTIQDLNAKISYIVAENASLRQQMGGNGAGAGAVCPPPVMYPHPGMAPMPYPWMPCPPYVVKPQVSQVPLVPIPRLKPQQPTAAPKAKKTEARKAEGKTKKVASVSFLGLLFFIILFGGLVPMVNVKYW…
>PgbZIP18
MPRTYGGVPCFRFIASLARKGGKRWSEDQGLLQQQHCEKVQNIIIKPIKDEEFFEADLNPTCTTSYASSASGKSRQNLTEAEKEARRIRRILANRESARQTIRRRQAIFDELTTKAADLAWENGKLKREMESAVKEYDSLKSTNESLKIQMIKMLKVEAEETQEETHAEIAACPSTKSPFLICNQPAFFPFVWPSMVQPTNSVQLQCGPQGGIVFPSPIPMPANDKLDLSSFGEGNPIITNGSGPPLYVLPCPWLFPLPQHSFEHQLQSFDLNDKPHETLHSNQHSPCSSAETAVLMENCHLLPFKVKAEASIPGIVVEQEKSSQSENTREVKTLSTAAGDIASSVLEKSQVPEIGKKMEDATAAAKARKRRKELTKLKASIAGSFACIMSRKADFLPV…
>PgbZIP12
MGFARSLVQSTSSPEQESKFQILGAHPFMASSNKANNFQTQAILEHHHHHQQHQYEQQQQQQHQFHQQQIQGHHHQQHQHQQQHQQNNNQISFGMIQSSSSTSSQLPNNFISKDGGAYDLGELDQALFLYLDGQDPSAVQDQRQSSGGGMRPPTLNIFPSQPMHVEPSSTKGNTSTGLVSPETSGSKRSSEPSMELTQPKNEHAPTPPQQSKVIKREGNKKGPTSSSEQECPKTPDPKTLRRLAQNREAARKSRLRKKAYVQQLESSRIKLTQLEQELQRARTQGVYLGGGAVLGAEQGISLSMANMSSDAAVFDMEYARWLEEHHRLMCELRAAVQEHLPENELRLFVDNCLAHYDEMMNLKSMVAKTDVFHLMSGTWKTPAERCFMWMGGFRPSDII…
>PgbZIP20
MAQLPPKAPTMPQTWPSFSYQMMQMPSSAAQPPSWVDEFLDFSSSRRNSHRRSVSDPIAFIEAPFIEECRNSNNGATTTLNNIGFERLDDDQLSSMFADDVAANWPSTRSSSNSSSPSDQNSDNEEKATAAEQLLHKQQQPKNEPGEVEDGGCPPKTDPDKFAFQASGDTIVDPKRVKRILANRQSAQRSRVRKLQYISELERSVTTLQTEVSALSPRVAFLDHQRLILNVDNSALKQRIAALAQDKIFKDAHQEALRKEIERLRKLYNEQQNVKKMGDNATSPPLEQSPTSFNNITSTDEE*
>PgbZIP14
MGTQTMGSSGGGSGTQEPKSDSLARQSSLYNLTLDEVQHQLGDLGKPLSSMNLDELLKSVWTAEANQGVVGGVDYVQQGQLASASSLYQQSSLTLNRDLSKKTVDEVWQDIQQGQRKRSNSNIDRKASRDRQPTLGEMTLEDFLVKAGIVAESSPGNKNAALGADPIALPQQSIAHQAQWVNYQIPPIHQPPQQQSHRQQQNMLNVFMPGHPVQQPLPISANPIMDAAYPDTQMTMSPSPLMGTLSDTQTPGRKRVAPGDVIEKTVERRQKRMIKNRESAARSRARKQATRAFYVDKQAYTHELENKVSRLEEENERLKRQKGL*
>PgbZIP16
MSGEGGADRNPEKRPVGHMKSTHITQVDSKTDASLCLRDLEEYRNRLLDINNGIRCGSSLNDNNSNENTNSNNGTVILVLNTICALLIHLTTHHSLIMFSHNRVPVPPFFSNADEVLEVEARIRADRSQYFESTPDSSLVNSRVMILGKGKEKEETVPRRAVTRQRGGPVPARWVLEERATLKGMTGADREAYSTLIFPLDILSDKPAEKKLDWSKTRFSSSRTASPSTHTVESNSSVLSDVVIVVAFSPPIVPVQYVHLKRSWNPSDVGSRLLGKGSWVSLYIRKWYVGDICCVGLGSRIVRVSSLEIGLHPVRYGCTCGLMLGGFPSLHAMSLYAYQIIEWPECRSSGSDGDQKLAMIDERKRKRMESNRESARRSRKRKQEHLDELIG*
>PgbZIP15
MGSKRLKVGAEADFSVAGRMPSFVSQIPVSNSNGTEGNTAHSSRVSHFGAPEQPPGFRVGDTSNVNRMFNPTNLANQAVHPDLQFGAFDKMLQLQKGRQANLASISGSHRDNWVESNMADSPRTDTSGDMDPDDKNPKFDMDPSTAIVASDSSDKSKEKSSEQKTLRRLAQNREAARKSRLRKKAYVQQLENSRLKLTQLEQELQRARQQGGLVSSSGDQSQVNGGNGALAFDVEYARWTEEQNRQINELRAAVNSHASDTELRTVVDNVIAHFDDIFRLKGTAAKADVFHIMSGMWKTPAERCFMWIGGFRSSELLKLLLNQLEPLTELQLAGIYKLQQSSQQAEDALSQGMEALQQSLAETLASGSPGPSGPSGNVANYMGQMAMAMGKLGTLEGFL…
>PgbZIP21
MGSSEMDKPTKEAKDGKESKTPTSQEQAPATSTGTVNPDWSGFQAYSPMPPHGFMASSPQAHPYMWGVQHLMPPYGTPPHPYVAMYPHGGIYAHPSIPPGSYPFSPFAMPSPNGVAEASGNTPGSMEVDGKSSEGKEKLPIKRSKGSLGSLNMITGKNNEPSKALVASTNGGYSKSAESGSEGSSEGSDGNSENDSQMKSGSRQDSLEGEVSQNGNAGHGSQNGGSNTPQSMINQSMTVMPISASGTPGAVPGPTTNLNIGMDYWGGANASAFPAIRGKVSSAPVAGGMVTAGSRDNVQSQLWLQDEREIKRQRRKQSNRESARRSRLRKQAECDELAQRAEVLKEENASLRAEVSRIRSEYEQLLAQNASLKERLGEAPGQDDARSGRNEQHMGNENQ…
>PgbZIP25
MDPKFAGKPIMAQHSGRSDLDQMSDTPTRGAHHRRAQSETFFRFPDDILLDDVVADFNLANLDFHSLSPDAAPMTTTVDSSSKSEEESSNGGADKPPPSKTARSGGSMSHFRSLSVDADFFDGLGFGGGSDVPEERKVGSGSGPFHHRHSNSMDGGQATSFEGDSMGMMVDNAKKALGPDRLAELSLIDPKRAKRILANRQSAARSKERKIRYTSELERKVQTLQTEATTLSAQVTMLQRDTTGLTSENKELKLRLQAMEQQAHLRDALNETLREEVQRLKIATGQIPSVNGNSYSRSLPPQYLHHFGNHPGQQPQQQQQQQQQQQLRMPNATTNNQTRSGQPRPTFMDFN*
>PgbZIP28
MGDLVAQFDDQFNWADLFDDPNFFDIQVPDPSLVPNDFSNLSPDSLNFSVDDIEQLLMNDDDNDREDLSNGFMSDILLDSPVVCDGSPGEVVDDVSDGNKNSSPSGEEKEDEDEEKDSAAVFKENNESTDADADADDPLSKKRKRQLRNRDAAVRSRERKKMYVKDLEVKSRYYEGECKRLGMLLQCFLAENQALRLSLQNSKRFDASMTKQESAVLLLESLLLGSLLWFLGIMCLLILPSQLHPSLGGAVQLEIVESERQQNLTPKKVASKTCDRLVLQSFLMGKRCKASRSRMKRSIHTRQVLA*
>PgbZIP26
MESSDGLPNSRSSTGKETLIPTVIPYPFVPPRYYSSSLSHVVGGGSNRSIPNPTPTETGLMRSHHQRCSSESVLPIEDQPSWLDDLLDEPDSPLYKGHRRSASDSSAYLDPSVETFNRRKESMLNNFSTGAWSSSPQNFANCRDHTNHASTLNSTQKSFSGQQNWVFQSSPNSSMNFSNGIPATRDGSITLQTSSGPSACSGPQETDRLPVMSSTISDQNQDRAGPSASQNPKNLGEKGDFSQANTSASKADVKHAKQKTAHRSRVRKLQYIAELERNVQVLQAEGSAVFAEIEFLDQQNLILSMENRALRQRLDSLSQEQLIKQLQHEMLERELGRLQALFQLQMQQQQLQRQQQQQQQQQKQQNAKNSRAKFKDLNSQFGNLSLNQNEASTSADSTT…
>PgbZIP24
MASSKLMASSTSRNSDLIRRRSSSSSSTKLSSISELSNHIQRRPTTSSSTNTTTNYFEPMTVDGLLRNVYVDNNEASESTLLDAEITLLDAAGAVTPISDNDANGAIRRQEIVSSVNGGNKTVDDVWKEIVAGRSCKQEVPDEMMTLEDFLAKAGAVDEEDVKVVPQPLLTERLSGGIYTYDSLPVPVAVDGALGFGNGVEAIGGRGKRRAILEPLDKAAQQRQRRMIKNRESAARSRERKQAYQIELESLAVKLEEEHEMLLKEKAERTKERFKQLMENIIPVVEKRRPARVLKRVRSVQW*
>PgbZIP27
MHAQNEGPFSPSIFPTTYCLPVPAASFFLSLKMSSESRVKDLNIYGKQAIAIAGSPLKSPSSLARRPILQTTSTSTSRSIDDVWNDISLSSLHHRTAAATDTTNPFHDFFSPSSTTNPCPGHFPPVHNHTTSGRAAGKVISVNQVPEPITNYLYKSSVSTSQSCNCAEPNFVSSSKPPPPNFIALPSSSSSNSSLPMKRPDPEYCEKHKRLMKNRESAARSRARKQARADELDLEVERLTVENAMLKKQLQQLQKLSNAAAPARVPKRCRLNRALTSPF*
>PgbZIP22
MVSPPHNEYQEPHFPLLVGQDSLNNLSLHEFHTSLANTEEDSQFMQNPSSSSSSSSSSPPIVLKRNVEQVWKESFHQPRDKATNNMCFRQQLAPGERTSEEFLVRNGNDHDSIVCSPQQLMAIDRTAMVDSNFKVAELGYLDKQLGYPVVPIQVERKHCQLTNETLEKTVERRQRRMIKNRESAARCRARKQAYTNRLEHQVSELRRRNDGLKKLKEAQMVLEDSDPPLMPRYQLRRTTSSTF*
>PgbZIP23
MNGQAFSNGITRTTLFTCWFEDFAEFNSNNHFEVVNSMASTSTQFATSRRMGIYDPLHQISMWEDVFEGNISPNTGASTISQLDARIDNKSEYTSNESLGPSPDSQAAKNISDKLQRRLAQNREAARKSRLRKKAYVQQLETGRLKLAQLEQELERARQQGAYGGALNMGNALLGGSVNSGIAAFEMEYDLWVGEQQKKDCELRNVLQAHVSDIELRIFVESGLSHYYDLFRMKADAAKADVFYLISGLWRTPVERFFLWIGGFRPSELLNVTPSNIQIIFTPRYVARSRHLDLFQS*
>PgbZIP32
MGDTEEGGSTDMMQRVQSSFGTSSSSIPKPISFNQLDIPQLNTSQFRAQMRQFSPNFHNVDCGNKRVGIPPSHPQIPPLSPYSQIPVTRPGNQQMGNPNFTLGPSSHSRSLSQPSFFSLDSLPPLSPSPYRDSPSAPACDQLPGDVSMEDRDGSSHSLLPPSPFGGRGNSMRVGESLPPRKAHRRSSSDIPFGFSTIMQSSPPLIPLRGPATLERSTSARDHPGAKPVQLVKRESSWEKGGDNNAEGMGERKSEGEVVDDLFSAYMNLENIDTLNSSGTDDKQGTENREDLDSRASGTKTNGGDSSDNEATSSVNESGHSMQRSGISSMSEKREGLKRNAGGDIAPTTRHYRSVSMDSFMGKMNFGDESPKLPPSPGGRPGQLSPSDSIDGNSNGFSLE…
>PgbZIP29
MASSKVMASTSPANPDLPRQSSIHSLTLSELQTDPSKNFGSMNMDELLKNIYADSEAFPAAGEGGARGNGVGLTSQGSFSLPKSMGNKTVDEVWKEIVSGTSDNREPEMTLEDFLTKAGAVREEDVRLSAVAPVPGYALDSIINAPQFQAPGLNMQSAASAPGGFGIDSVGFGNGIVALGAPAAGGGSVRGKRRAVEEPPVDRATQQKQRRMIKNRESAARSRERKQAYTVELESLVTQLEEENARLMREEEEQTRERFKQLMENLIPVVEKRRPPRVLRRTNSL*
>PgbZIP30
MKFVSIACSASGHDSSKGQEKDVSGPSGIPSLPVMQKKSAVQVKSTTSGSSREQSDDDDLEGDTETTENMDPADVKRVRRMLSNRESARRSRRRKQAHLTELETQLPLRTTPTSPTPYPSTLPVTSSVNNPTQANLLQVSQLRVENSSLSKRLTDIVQKYNDAAVDNRVLKADVETMRAKVKMAEEAVKRVTGLNPLFQAMSDISTIGMPSYTCSPSDTSTDAAVPLQDDPKQHQPFYQPASNNHLSSTHDPRIQNGLVDLPTATLDNVQHDVGVQKMGRTASMQRVASLEHLQKRIRGGVSSSGNQISGDQ*
>PgbZIP31
MTQLPPKVPNMTPNWPDNISHHQRMPSLDGLLTPNTANTAATTSQAPLWIDEFLDFSSSKRGSHRRSISDSAAFVDLPPMAGEEEECRRLSGLGSKTNNAASGGSTGHEFDRFDEEQFMSMFIDDAGPAMSCSNPPSPNSDHNSINDDKQVPIDQQIMQAQLIRSEAEEEDSLCNSDGQVNLHANFDNSNDKIFDPKRIKRILANRQSAQRSRVRKLHYISELERSVNSLQAEVSVLSPRVAYLDHQRLVLNVDNSVLKQRIAALSQDKLFKDAHQDALKKEIDRLKQIYYQQNQKKMEIGTTSKSQSAIHDSHGFAKKVAI*
>PgbZIP35
MEDIAMKLTLTNGGSDQPHDDKVRFSYECNEGSKSENKFPPTDPSNVGGGGNVAAHPTYGITNVAAEEIIDFELKYGTSGNLNKEQKKFRRILSNRLSAQRSRVKKAMYLVDLEENLKDLEMMVSTLPSQIEHEKQELLRLRVENGILVQKLDICAEMANQKNAQIEKTRAEIKKLKELLMVNANSHVFNQQEELITGYGYDNYRLDEITTASFYLQSGPQSLLGTNLNQNGGIDLILSLSPTATTTGLDQDGLDLMQNTNPSTSAPANSPPK*
>PgbZIP37
MELSDESESISTGGKVQSEVLPEDLMEDHSTSSSEKQYLSIFSLTIDKIQSMSGRSFGSMNIDEFLNSVWSDEFQVISSNVNEELTSNENGMEQATLLRQRSLSVPIPLSGKTVDEVWAEIQQNNHAQQNHRHAFPGLMTEKEALHQLQTLGEMTLEEFLVMAGVMKESPNFPLQQGILEENLNSNPSAGSFFSNGTSLDMSISMGQMMGYHHELSTPSSCVENGNTLLSSKGSSMHQMLTLGSSGFMGEPSTETIGNGKSCNSPLNAGETNSKRKTFPSMEAAIERRQRRMIKNRESAQRSRARKQAYTAELEIELKQVRDENESLKLALEEAQNKLKQEAKRIKIKVQRKVMRRLKWKNLKFVMMMNLNKW*
>PgbZIP36
MASHRVGEAGLSGSGPSNHHHHHHHLPHAVFSGLNHPNLSFINQEGPAFDFGELEEAMVLHGIKIINDESKLPLYTAASAARPAPAATLEMFPSWPMRFHQTPTGGSSKSGGGGFRESTDSGSALNNTTSSKAEEEEEEDHLEPESPISTSSNKTSSGQQQAFDQHHQLLQLPQQVDMDSEDSPRTGGSSQSQPAAPKSTLEKKKGAASTSERVLDAKTLRRLAQNREAARKSRLRKKAYVQQLESSRIRLTQLEQDLQRARSQGLFMGGGGGVGGSISSGAAIFDMEYARWLDDDQRHMAELRTGLHAHLSDGDLRVIVDGYIAHYDEIFSLKGVAAKSDVFHLITGMWTTPAERCFLWMGGFRPSELIKMLAIQLDPLTEQQVVGIYSLQDSSQQAE…
>PgbZIP33
MATPPPQRQASSGSDGDQKLAMIDERKRKRMESNRESARRSRKRKQEHLDELIGQINQLKNDNNLLMQKIDFATPKYISVAHENNVLRAQIAELTDRLNSLNSVLHIAEDVIGFDMDIPEIPDTLMEPWQLPFPFEPITASTNMFQC*
>PgbZIP34
MDSPKNPSISNPNPTLSPSIAPNCFYFATSNDAASSPFKGSHHHRVHCEGVSGIANDNCDGEGDGFACVEEEIEIYDEDLFAKYIDVDMIGRVGGGGEGEEMVEVGNGGSGREEEKGKNEENVRGNVQHCGRDCSKKVMPADELAELWITDPKRAKRILANRQSAARSKERKARYIALLERRLVAIEKEARTLARRLSVYQRDARNLTAENTELRLRLEKMGRQAQLSDDLNEALKREVDRLRLATGEIRSARAISFKYLGRHHTQFSSTLPVAATPHDIQLLPLFHTSASTTPNRPLSANVRSNALDCLQGLDIRNKGCLLQVENPLRSASASHNSSSQGLNNVFCSREYLVRVASPSISDSGSDNSAATY*
>PgbZIP41
MQEQAATSSLAASLPSSSEPSSSSALQIEVKEGMESDDEIRRVPEIGGEAVGTSADGREASSAAGRDRVQGSGEGTRKRGRSPADKENKRLKRLLRNRVSAQQARERKKAYLNELEVRVKDLEKKNSELEERLSTLQNENQMLRHVCHTQPHFTMTYHTFIYSFNITIMMSFHYFPMAISGGMPIFWFELMVLVWLA*
>PgbZIP39
MEMFPMKQASSESEQDDRYAMLDEKKRKRMISNRESARKSRMKREQHMKDLNDQVLYFETRKNEMIRKLNEVTELYRAIEVENIIMRSQKQELTERLECAEILFSYVGETSGVPVRAHQDPWHRSWQQPPPQSMPIMSSAGFFQF*
>PgbZIP38
MNSTSTQYVTARRMGVFEPIHQISMWGDFNDNGYQDASTTMITELDTKLDNQSDDTSQGVIGHSNLYDQEATKPVDKVLRRLAQNREAARKSRLRKKAHVQQLETSQLKLLQLEQELAQIRQQGAGGSGTANSGIAAFEMKYGQWVEEQTRQTNELRTALQSQLTDMELLILVNRGMKHYFDLFHMKATAAKADVFYLMSGMWKTPTERFFFWIGGFRPSELLKILKPHLDLVKQQSMDVHNLIQSCQQLEDALSQGMEKLKDTLAEAVAFGQLDEGSYYPKMYSAMDRLEALVTFVNQADHLRMETLQQMVRILTTRQAASGLVVLGEYFQRLRYLSTEWATRLREPA*
>PgbZIP40
MAADKSFRMEKDSLGGLEGSMESDDEIRRVPEIGGEAVGTSADGREASSAAGRDRVQGSGEGTRKRGRSPADKENKRLKRLLRNRVSAQQARERKKAYLNELEVRVKDLEKKNSELEERLSTLQNENQMLRH*
>PgbZIP44
MGSSEEAKACKPEISSSPAPDQANVHVYPDWAAMQAYYGPRVAVPPYFNSAVASGHAPHPYMWGPPQHMMPPYGAAYAAIYPHGGVYTHPGVPLAATPLSNDSPAKSSGNSDRGLMKKLKGFDGLAMSLGNGSADSDDGGNTHSQSGETEGSSEGSDGNTKGGDQTCGKRSWDGSPNNAKVRKVETQSSQALSGEANGASKKVMGVSVSTVGVSNKLEGAVLSASPTTELELRKSPTANVKTTPTTVQQPGHMIPHESLLQNERELKRERRKQSNRESARRSRLRKQAEAEELAIKVDSLTTENLTLKSELNQLTDNSEKLKHENAKLMEKLKNAQQEQIEDPRSDNKGLSLSTANLLSRVNNSSSSIVRNDGEGEIYENTSKSGAKLHQLLDSSPRTD…
>PgbZIP42
MDDGELDFSNHEMFTGTNIGDLPSSGSMDSLFDEILKDSHACTHTHTCNPPGPDFSHTHTCYHVHTKIVPALSDDKTPTDDTAESSDKKSKKRPLGNREAVRKYREKKKARAASLEDEVVRLRTLNQQLMKRLQGQAVLEAEVARLKCLLVDIRGRIEGEIGSFPYQKSANPNPVNPNLTSAYVMNPCNMQCNDQAYCLHPGVDGRNGDGAALLDQGFNGCEFENLQCMGNQNAGLNELQGCGAGDDFPPVRTSGGNKKKGGARAATAS*
>PgbZIP43
MEASESDSSNNGEVKSNVVPQTPEDLLQDRSISLSENQHLSIFSLTLDEFQSRSGMSFASMNFDEFLNSVTSEIEFQVSSNVNQELVNNENGIAAQTGLPRQGSLSVPTQLCSITIDEVWAEIQQNNHVDQENHGHGHQEAFPSFSTNDELLPLQSLGEMTLEEFLIKAGVIKESPNNDLPLQQGGVLEQHLNINHSISYITSNSTFLDTTSISVEQVMDGYEFSTPPSNCDDGNGNTLISDHGSSVYPMLALDSGGCVGGEPTNNVENQICKSPSNAGETSSKRKRSAAPMEMNMERRQRRMIRNRESAARSRARKQAYAEALEKELTQQREENESLKLALKEAESKLIQELSNEHDLLMKKKLRTIRRTISSSW*
>PgbZIP45
MDKDKSPNHGGGLPPPSGRYSVFSPPGSGNSFNVKPEPMPPLGLGTNSESGRFGHGMSSDSSRFSHDISRMPDNPPKNLGHRRAHSEILTLPDDISFDSDLGVVGGFDGPSFSDDTEEDLLSMYLDMDKFNSSSATSSFQVGESSSAATRTSAAAAPLPENMAPSSSERPRVRHQHSQSMDGSTSIKPEMLMSGPEDTSAADAKKSMSAAKLAELALVDPKRAKRIWANRQSAARSKERKMRYIAELERKVQTLQTEATSLSAQLTLLQRDTNGLTAENSELKLRLQTMEQQVHLQDALNDALKEEIQHLKVLTGQNIANGGPMMNFPPLW*
>PgbZIP46
MASSSGTSSVSSLLQNSGGSEENLQLLVDQRKRKRMISNRESARRSRMRKQKHLDDLMTQLSQLRKENNQIISSMRLTTQHYHKVEAENSILRAQVAELSHRLQSLNEIINCLNYNPINASFATEEPYTDSVDEFMNNYSLSYLYVNQQPILASADMVQY*
>PgbZIP47
MASSSGTSSGSISQLQHSGSEGGLQEIMDQKKRKRMVSNRESARRSRMRKQKHLDDLVAQVGQLSSENSHIVTNMKLTGQMYLNLDAENYILRAQLAELTHRLDSLNEIMNCLNSTDGLFETDNHDDPMISGGIDSFLNPWNLLDVNQPIMAYPIQIIYDRHLPIGRLSTVVSVLVHSRYSSVAAYKACKLEFGEEMVNEVSALEQGRYWQLLVSS*
