# Supplementary material for: Genome-wide identification of bZIP transcription factors and their expression analysis in Platycodon grandiflorus under abiotic stress
Source: Front Plant Sci. 2024 May 28;15:1403220. doi: 10.3389/fpls.2024.1403220 (PMC11165138; doi:10.3389/fpls.2024.1403220)
Supplement: Supplementary file 3 [file Table_3.xlsx]

## Sheet: Sheet1
The list of cis-elements of PgbZIP genes promoter.
Pg_chr01_03120T	685	725	abscisic acid responsiveness
Pg_chr01_03120T	1850	1890	abscisic acid responsiveness
Pg_chr01_13470T	927	967	abscisic acid responsiveness
Pg_chr01_13470T	947	987	abscisic acid responsiveness
Pg_chr01_13470T	948	988	abscisic acid responsiveness
Pg_chr01_13470T	972	1012	abscisic acid responsiveness
Pg_chr01_13470T	973	1013	abscisic acid responsiveness
Pg_chr01_13470T	1676	1716	abscisic acid responsiveness
Pg_chr02_21840T	849	889	abscisic acid responsiveness
Pg_chr02_21840T	945	985	abscisic acid responsiveness
Pg_chr02_21840T	981	1021	abscisic acid responsiveness
Pg_chr02_21840T	983	1023	abscisic acid responsiveness
Pg_chr02_21840T	1293	1333	abscisic acid responsiveness
Pg_chr02_26970T	1865	1905	abscisic acid responsiveness
Pg_chr02_26970T	1866	1906	abscisic acid responsiveness
Pg_chr02_36690T	458	498	abscisic acid responsiveness
Pg_chr02_36690T	470	510	abscisic acid responsiveness
Pg_chr02_45810T	1604	1644	abscisic acid responsiveness
Pg_chr03_05930T	518	558	abscisic acid responsiveness
Pg_chr03_05930T	519	559	abscisic acid responsiveness
Pg_chr03_13860T	1787	1827	abscisic acid responsiveness
Pg_chr03_13860T	1878	1918	abscisic acid responsiveness
Pg_chr03_14590T	1000	1040	abscisic acid responsiveness
Pg_chr03_15470T	876	916	abscisic acid responsiveness
Pg_chr03_15470T	946	986	abscisic acid responsiveness
Pg_chr03_23670T	214	254	abscisic acid responsiveness
Pg_chr03_23670T	1184	1224	abscisic acid responsiveness
Pg_chr03_24210T	726	766	abscisic acid responsiveness
Pg_chr03_24210T	729	769	abscisic acid responsiveness
Pg_chr03_24210T	1657	1697	abscisic acid responsiveness
Pg_chr03_29870T	413	453	abscisic acid responsiveness
Pg_chr03_29870T	414	454	abscisic acid responsiveness
Pg_chr03_29870T	450	490	abscisic acid responsiveness
Pg_chr03_29870T	451	491	abscisic acid responsiveness
Pg_chr03_29870T	562	602	abscisic acid responsiveness
Pg_chr03_29870T	626	666	abscisic acid responsiveness
Pg_chr03_41000T	485	525	abscisic acid responsiveness
Pg_chr03_41000T	486	526	abscisic acid responsiveness
Pg_chr03_41000T	1022	1062	abscisic acid responsiveness
Pg_chr03_41000T	1023	1063	abscisic acid responsiveness
Pg_chr03_41000T	1602	1642	abscisic acid responsiveness
Pg_chr03_41000T	1651	1691	abscisic acid responsiveness
Pg_chr03_41000T	1652	1692	abscisic acid responsiveness
Pg_chr04_13120T	722	762	abscisic acid responsiveness
Pg_chr04_13120T	723	763	abscisic acid responsiveness
Pg_chr04_14910T	154	194	abscisic acid responsiveness
Pg_chr04_14910T	155	195	abscisic acid responsiveness
Pg_chr04_14920T	269	309	abscisic acid responsiveness
Pg_chr04_14920T	376	416	abscisic acid responsiveness
Pg_chr04_14920T	1008	1048	abscisic acid responsiveness
Pg_chr04_14920T	1012	1052	abscisic acid responsiveness
Pg_chr04_14920T	1014	1054	abscisic acid responsiveness
Pg_chr04_14920T	1015	1055	abscisic acid responsiveness
Pg_chr04_17120T	657	697	abscisic acid responsiveness
Pg_chr04_17120T	1657	1697	abscisic acid responsiveness
Pg_chr04_44620T	647	687	abscisic acid responsiveness
Pg_chr04_44620T	1700	1740	abscisic acid responsiveness
Pg_chr04_44620T	1701	1741	abscisic acid responsiveness
Pg_chr05_11720T	285	325	abscisic acid responsiveness
Pg_chr05_11720T	674	714	abscisic acid responsiveness
Pg_chr05_11720T	676	716	abscisic acid responsiveness
Pg_chr05_11720T	728	768	abscisic acid responsiveness
Pg_chr05_11720T	1231	1271	abscisic acid responsiveness
Pg_chr05_11720T	1989	2029	abscisic acid responsiveness
Pg_chr05_24330T	1907	1947	abscisic acid responsiveness
Pg_chr05_24330T	1908	1948	abscisic acid responsiveness
Pg_chr05_25760T	1644	1684	abscisic acid responsiveness
Pg_chr05_25760T	1645	1685	abscisic acid responsiveness
Pg_chr05_35190T	1087	1127	abscisic acid responsiveness
Pg_chr05_35190T	1107	1147	abscisic acid responsiveness
Pg_chr05_35190T	1153	1193	abscisic acid responsiveness
Pg_chr05_35190T	1154	1194	abscisic acid responsiveness
Pg_chr05_35190T	1496	1536	abscisic acid responsiveness
Pg_chr05_35190T	1975	2015	abscisic acid responsiveness
Pg_chr06_14230T	1777	1817	abscisic acid responsiveness
Pg_chr06_15840T	139	179	abscisic acid responsiveness
Pg_chr06_15840T	1523	1563	abscisic acid responsiveness
Pg_chr06_15840T	1524	1564	abscisic acid responsiveness
Pg_chr06_27140T	1453	1493	abscisic acid responsiveness
Pg_chr07_19130T	1021	1061	abscisic acid responsiveness
Pg_chr07_19130T	1562	1602	abscisic acid responsiveness
Pg_chr07_26570T	1186	1226	abscisic acid responsiveness
Pg_chr07_26570T	1187	1227	abscisic acid responsiveness
Pg_chr08_00320T	203	243	abscisic acid responsiveness
Pg_chr08_24200T	1068	1108	abscisic acid responsiveness
Pg_chr08_24200T	1422	1462	abscisic acid responsiveness
Pg_chr08_24200T	1584	1624	abscisic acid responsiveness
Pg_chr08_24200T	1585	1625	abscisic acid responsiveness
Pg_chr08_31010T	684	724	abscisic acid responsiveness
Pg_chr08_31010T	767	807	abscisic acid responsiveness
Pg_chr09_28610T	142	182	abscisic acid responsiveness
Pg_chr09_28610T	143	183	abscisic acid responsiveness
Pg_chr09_28610T	1162	1202	abscisic acid responsiveness
Pg_chr09_28610T	1163	1203	abscisic acid responsiveness
Pg_chr09_28610T	1196	1236	abscisic acid responsiveness
Pg_chr09_28610T	1197	1237	abscisic acid responsiveness
Pg_contig00116_02430T	235	275	abscisic acid responsiveness
Pg_contig00116_02430T	280	320	abscisic acid responsiveness
Pg_contig00116_02430T	623	663	abscisic acid responsiveness
Pg_contig00116_02430T	624	664	abscisic acid responsiveness
Pg_contig00116_02430T	634	674	abscisic acid responsiveness
Pg_contig01856_00120T	1806	1846	abscisic acid responsiveness
Pg_chr01_03120T	1166	1206	anaerobic induction regulatory element
Pg_chr01_03120T	1587	1627	anaerobic induction regulatory element
Pg_chr01_03120T	1625	1665	anaerobic induction regulatory element
Pg_chr01_03120T	1646	1686	anaerobic induction regulatory element
Pg_chr01_13470T	689	729	anaerobic induction regulatory element
Pg_chr01_13470T	767	807	anaerobic induction regulatory element
Pg_chr01_24060T	690	730	anaerobic induction regulatory element
Pg_chr01_36170T	911	951	anaerobic induction regulatory element
Pg_chr01_36170T	1195	1235	anaerobic induction regulatory element
Pg_chr01_36170T	1695	1735	anaerobic induction regulatory element
Pg_chr02_21840T	1810	1850	anaerobic induction regulatory element
Pg_chr02_24710T	195	235	anaerobic induction regulatory element
Pg_chr02_24710T	1888	1928	anaerobic induction regulatory element
Pg_chr02_36690T	39	79	anaerobic induction regulatory element
Pg_chr02_36690T	703	743	anaerobic induction regulatory element
Pg_chr02_45820T	549	589	anaerobic induction regulatory element
Pg_chr03_05930T	1212	1252	anaerobic induction regulatory element
Pg_chr03_05930T	1536	1576	anaerobic induction regulatory element
Pg_chr03_14590T	1201	1241	anaerobic induction regulatory element
Pg_chr03_15470T	1112	1152	anaerobic induction regulatory element
Pg_chr03_23670T	108	148	anaerobic induction regulatory element
Pg_chr03_23670T	609	649	anaerobic induction regulatory element
Pg_chr03_23670T	652	692	anaerobic induction regulatory element
Pg_chr03_23670T	1053	1093	anaerobic induction regulatory element
Pg_chr03_24210T	393	433	anaerobic induction regulatory element
Pg_chr03_24210T	620	660	anaerobic induction regulatory element
Pg_chr03_29870T	175	215	anaerobic induction regulatory element
Pg_chr03_29870T	1438	1478	anaerobic induction regulatory element
Pg_chr04_13120T	1267	1307	anaerobic induction regulatory element
Pg_chr04_13120T	1385	1425	anaerobic induction regulatory element
Pg_chr04_13120T	1643	1683	anaerobic induction regulatory element
Pg_chr04_14910T	1155	1195	anaerobic induction regulatory element
Pg_chr04_14920T	1308	1348	anaerobic induction regulatory element
Pg_chr04_16600T	328	368	anaerobic induction regulatory element
Pg_chr04_17120T	1950	1990	anaerobic induction regulatory element
Pg_chr04_24190T	170	210	anaerobic induction regulatory element
Pg_chr04_44620T	455	495	anaerobic induction regulatory element
Pg_chr04_44620T	514	554	anaerobic induction regulatory element
Pg_chr04_44620T	769	809	anaerobic induction regulatory element
Pg_chr04_44620T	881	921	anaerobic induction regulatory element
Pg_chr04_44620T	1005	1045	anaerobic induction regulatory element
Pg_chr04_44620T	1928	1968	anaerobic induction regulatory element
Pg_chr05_11720T	773	813	anaerobic induction regulatory element
Pg_chr05_24330T	455	495	anaerobic induction regulatory element
Pg_chr05_24330T	873	913	anaerobic induction regulatory element
Pg_chr05_35190T	354	394	anaerobic induction regulatory element
Pg_chr05_35190T	535	575	anaerobic induction regulatory element
Pg_chr06_01830T	923	963	anaerobic induction regulatory element
Pg_chr06_01830T	1700	1740	anaerobic induction regulatory element
Pg_chr06_14230T	272	312	anaerobic induction regulatory element
Pg_chr06_14230T	1113	1153	anaerobic induction regulatory element
Pg_chr06_14230T	1118	1158	anaerobic induction regulatory element
Pg_chr06_14230T	1130	1170	anaerobic induction regulatory element
Pg_chr06_14230T	1521	1561	anaerobic induction regulatory element
Pg_chr06_15840T	125	165	anaerobic induction regulatory element
Pg_chr06_15840T	367	407	anaerobic induction regulatory element
Pg_chr06_27120T	327	367	anaerobic induction regulatory element
Pg_chr06_27120T	1653	1693	anaerobic induction regulatory element
Pg_chr06_27140T	341	381	anaerobic induction regulatory element
Pg_chr06_27140T	1653	1693	anaerobic induction regulatory element
Pg_chr07_00550T	516	556	anaerobic induction regulatory element
Pg_chr07_00550T	639	679	anaerobic induction regulatory element
Pg_chr07_00550T	703	743	anaerobic induction regulatory element
Pg_chr07_00550T	745	785	anaerobic induction regulatory element
Pg_chr07_19130T	283	323	anaerobic induction regulatory element
Pg_chr07_19130T	1893	1933	anaerobic induction regulatory element
Pg_chr07_26570T	155	195	anaerobic induction regulatory element
Pg_chr07_26570T	485	525	anaerobic induction regulatory element
Pg_chr07_26570T	520	560	anaerobic induction regulatory element
Pg_chr07_29960T	651	691	anaerobic induction regulatory element
Pg_chr07_29960T	736	776	anaerobic induction regulatory element
Pg_chr08_00320T	513	553	anaerobic induction regulatory element
Pg_chr08_00320T	1725	1765	anaerobic induction regulatory element
Pg_chr08_00320T	1779	1819	anaerobic induction regulatory element
Pg_chr08_24200T	15	55	anaerobic induction regulatory element
Pg_chr08_24200T	194	234	anaerobic induction regulatory element
Pg_chr08_31010T	927	967	anaerobic induction regulatory element
Pg_chr08_31010T	1151	1191	anaerobic induction regulatory element
Pg_chr08_31010T	1255	1295	anaerobic induction regulatory element
Pg_contig00116_02430T	1516	1556	anaerobic induction regulatory element
Pg_contig00116_02430T	1574	1614	anaerobic induction regulatory element
Pg_contig00116_02430T	1736	1776	anaerobic induction regulatory element
Pg_contig01856_00120T	295	335	anaerobic induction regulatory element
Pg_contig01856_00120T	712	752	anaerobic induction regulatory element
Pg_contig01856_00120T	920	960	anaerobic induction regulatory element
Pg_contig01856_00120T	1041	1081	anaerobic induction regulatory element
Pg_contig01856_00120T	1779	1819	anaerobic induction regulatory element
Pg_chr01_13470T	142	182	auxin-responsive element
Pg_chr01_36170T	1416	1456	auxin-responsive element
Pg_chr01_36170T	1601	1641	auxin-responsive element
Pg_chr02_24710T	552	592	auxin-responsive element
Pg_chr02_24710T	1193	1233	auxin-responsive element
Pg_chr02_26970T	706	746	auxin-responsive element
Pg_chr02_36690T	385	425	auxin-responsive element
Pg_chr02_45810T	42	82	auxin-responsive element
Pg_chr03_18510T	379	419	auxin-responsive element
Pg_chr03_29870T	809	849	auxin-responsive element
Pg_chr04_13120T	45	85	auxin-responsive element
Pg_chr04_16600T	261	301	auxin-responsive element
Pg_chr04_47570T	856	896	auxin-responsive element
Pg_chr05_35190T	1354	1394	auxin-responsive element
Pg_chr07_26570T	45	85	auxin-responsive element
Pg_chr07_29960T	1388	1428	auxin-responsive element
Pg_chr08_00320T	172	212	auxin-responsive element
Pg_chr08_00320T	383	423	auxin-responsive element
Pg_chr08_24200T	722	762	auxin-responsive element
Pg_chr08_31010T	593	633	auxin-responsive element
Pg_chr01_13470T	1794	1834	auxin-responsive element
Pg_chr01_24060T	325	365	auxin-responsive element
Pg_chr01_24060T	1751	1791	auxin-responsive element
Pg_chr01_36170T	402	442	auxin-responsive element
Pg_chr02_45820T	239	279	auxin-responsive element
Pg_chr03_13860T	1881	1921	auxin-responsive element
Pg_chr03_18510T	768	808	auxin-responsive element
Pg_chr03_05930T	1239	1279	cell cycle regulation element
Pg_chr04_13120T	746	786	cell cycle regulation element
Pg_chr07_29960T	1829	1869	cell cycle regulation element
Pg_chr08_24200T	1385	1425	cell cycle regulation element
Pg_chr03_05930T	370	410	circadian control regulatory element
Pg_chr03_14590T	1797	1837	circadian control regulatory element
Pg_chr04_14920T	1979	2019	circadian control regulatory element
Pg_chr05_25760T	926	966	circadian control regulatory element
Pg_chr05_35190T	1820	1860	circadian control regulatory element
Pg_chr06_27140T	1201	1241	circadian control regulatory element
Pg_chr07_00550T	1423	1463	circadian control regulatory element
Pg_chr08_24200T	123	163	circadian control regulatory element
Pg_contig01856_00120T	1637	1677	circadian control regulatory element
Pg_chr01_24060T	218	258	defense and stress responsiveness
Pg_chr03_13860T	1354	1394	defense and stress responsiveness
Pg_chr03_23670T	1563	1603	defense and stress responsiveness
Pg_chr03_41000T	847	887	defense and stress responsiveness
Pg_chr04_13120T	176	216	defense and stress responsiveness
Pg_chr04_13120T	241	281	defense and stress responsiveness
Pg_chr04_14910T	19	59	defense and stress responsiveness
Pg_chr04_16600T	374	414	defense and stress responsiveness
Pg_chr04_47570T	1692	1732	defense and stress responsiveness
Pg_chr05_24330T	706	746	defense and stress responsiveness
Pg_chr06_27120T	428	468	defense and stress responsiveness
Pg_chr07_00550T	54	94	defense and stress responsiveness
Pg_chr07_26570T	862	902	defense and stress responsiveness
Pg_chr08_24200T	1140	1180	defense and stress responsiveness
Pg_chr08_31010T	1095	1135	defense and stress responsiveness
Pg_chr01_24060T	1290	1330	endosperm expression
Pg_chr02_45810T	357	397	endosperm expression
Pg_chr02_45820T	1167	1207	endosperm expression
Pg_chr03_15470T	542	582	endosperm expression
Pg_chr03_15470T	1508	1548	endosperm expression
Pg_chr03_24210T	356	396	endosperm expression
Pg_chr03_29870T	1939	1979	endosperm expression
Pg_chr04_13120T	1305	1345	endosperm expression
Pg_chr04_14920T	166	206	endosperm expression
Pg_chr07_26570T	138	178	endosperm expression
Pg_chr08_24200T	5	45	endosperm expression
Pg_chr08_24200T	632	672	endosperm expression
Pg_chr08_24200T	1615	1655	endosperm expression
Pg_chr01_24060T	1428	1468	gibberellin-responsive element
Pg_chr02_45820T	1868	1908	gibberellin-responsive element
Pg_chr02_48740T	1287	1327	gibberellin-responsive element
Pg_chr03_15470T	1241	1281	gibberellin-responsive element
Pg_chr03_15470T	1849	1889	gibberellin-responsive element
Pg_chr04_13120T	1841	1881	gibberellin-responsive element
Pg_chr04_24190T	396	436	gibberellin-responsive element
Pg_chr04_44620T	1740	1780	gibberellin-responsive element
Pg_chr04_47570T	1132	1172	gibberellin-responsive element
Pg_chr05_25760T	658	698	gibberellin-responsive element
Pg_chr05_25760T	1047	1087	gibberellin-responsive element
Pg_chr06_01830T	830	870	gibberellin-responsive element
Pg_chr06_15840T	685	725	gibberellin-responsive element
Pg_chr06_15840T	849	889	gibberellin-responsive element
Pg_chr06_27120T	149	189	gibberellin-responsive element
Pg_chr07_00550T	1652	1692	gibberellin-responsive element
Pg_chr07_00550T	1294	1334	gibberellin-responsive element
Pg_chr07_00550T	1983	2023	gibberellin-responsive element
Pg_chr07_19130T	1875	1915	gibberellin-responsive element
Pg_chr07_29960T	684	724	gibberellin-responsive element
Pg_chr07_29960T	1069	1109	gibberellin-responsive element
Pg_chr08_00320T	1903	1943	gibberellin-responsive element
Pg_chr08_24200T	1638	1678	gibberellin-responsive element
Pg_chr08_31010T	1226	1266	gibberellin-responsive element
Pg_chr08_31010T	1708	1748	gibberellin-responsive element
Pg_chr08_31010T	1889	1929	gibberellin-responsive element
Pg_chr09_28610T	1247	1287	gibberellin-responsive element
Pg_contig01856_00120T	1413	1453	gibberellin-responsive element
Pg_contig01856_00120T	1834	1874	gibberellin-responsive element
Pg_chr01_36170T	520	560	gibberellin-responsive element
Pg_chr02_36690T	556	596	gibberellin-responsive element
Pg_chr03_05930T	376	416	gibberellin-responsive element
Pg_chr04_14910T	1708	1748	gibberellin-responsive element
Pg_chr04_14920T	677	717	gibberellin-responsive element
Pg_chr04_16600T	684	724	gibberellin-responsive element
Pg_chr04_16600T	1550	1590	gibberellin-responsive element
Pg_chr06_15840T	788	828	gibberellin-responsive element
Pg_chr07_00550T	1326	1366	gibberellin-responsive element
Pg_chr01_03120T	684	724	light responsive element
Pg_chr01_03120T	1849	1889	light responsive element
Pg_chr01_13470T	927	967	light responsive element
Pg_chr01_13470T	947	987	light responsive element
Pg_chr01_13470T	972	1012	light responsive element
Pg_chr01_13470T	947	987	light responsive element
Pg_chr01_13470T	972	1012	light responsive element
Pg_chr02_21840T	848	888	light responsive element
Pg_chr02_21840T	945	985	light responsive element
Pg_chr02_21840T	983	1023	light responsive element
Pg_chr02_21840T	1293	1333	light responsive element
Pg_chr02_24710T	1145	1185	light responsive element
Pg_chr02_24710T	1206	1246	light responsive element
Pg_chr02_26970T	1865	1905	light responsive element
Pg_chr02_26970T	1865	1905	light responsive element
Pg_chr02_36690T	470	510	light responsive element
Pg_chr02_36690T	458	498	light responsive element
Pg_chr02_45810T	719	759	light responsive element
Pg_chr02_45810T	1604	1644	light responsive element
Pg_chr03_05930T	518	558	light responsive element
Pg_chr03_05930T	517	557	light responsive element
Pg_chr03_05930T	518	558	light responsive element
Pg_chr03_13860T	448	488	light responsive element
Pg_chr03_13860T	1786	1826	light responsive element
Pg_chr03_15470T	875	915	light responsive element
Pg_chr03_15470T	945	985	light responsive element
Pg_chr03_18510T	131	171	light responsive element
Pg_chr03_18510T	419	459	light responsive element
Pg_chr03_23670T	213	253	light responsive element
Pg_chr03_23670T	1183	1223	light responsive element
Pg_chr03_24210T	1657	1697	light responsive element
Pg_chr03_24210T	728	768	light responsive element
Pg_chr03_29870T	413	453	light responsive element
Pg_chr03_29870T	450	490	light responsive element
Pg_chr03_29870T	561	601	light responsive element
Pg_chr03_29870T	562	602	light responsive element
Pg_chr03_29870T	413	453	light responsive element
Pg_chr03_29870T	450	490	light responsive element
Pg_chr03_29870T	626	666	light responsive element
Pg_chr03_41000T	485	525	light responsive element
Pg_chr03_41000T	1022	1062	light responsive element
Pg_chr03_41000T	1602	1642	light responsive element
Pg_chr03_41000T	1651	1691	light responsive element
Pg_chr03_41000T	485	525	light responsive element
Pg_chr03_41000T	1022	1062	light responsive element
Pg_chr03_41000T	1651	1691	light responsive element
Pg_chr04_13120T	722	762	light responsive element
Pg_chr04_13120T	722	762	light responsive element
Pg_chr04_14910T	154	194	light responsive element
Pg_chr04_14910T	154	194	light responsive element
Pg_chr04_14920T	268	308	light responsive element
Pg_chr04_14920T	376	416	light responsive element
Pg_chr04_14920T	948	988	light responsive element
Pg_chr04_14920T	1014	1054	light responsive element
Pg_chr04_14920T	1014	1054	light responsive element
Pg_chr04_17120T	655	695	light responsive element
Pg_chr04_17120T	656	696	light responsive element
Pg_chr04_17120T	1656	1696	light responsive element
Pg_chr04_24190T	1932	1972	light responsive element
Pg_chr04_44620T	1700	1740	light responsive element
Pg_chr04_44620T	647	687	light responsive element
Pg_chr04_44620T	1700	1740	light responsive element
Pg_chr05_11720T	284	324	light responsive element
Pg_chr05_11720T	285	325	light responsive element
Pg_chr05_11720T	728	768	light responsive element
Pg_chr05_11720T	676	716	light responsive element
Pg_chr05_11720T	1230	1270	light responsive element
Pg_chr05_24330T	1907	1947	light responsive element
Pg_chr05_24330T	1907	1947	light responsive element
Pg_chr05_25760T	1644	1684	light responsive element
Pg_chr05_25760T	1275	1315	light responsive element
Pg_chr05_25760T	1644	1684	light responsive element
Pg_chr05_35190T	1153	1193	light responsive element
Pg_chr05_35190T	1496	1536	light responsive element
Pg_chr05_35190T	1086	1126	light responsive element
Pg_chr05_35190T	1107	1147	light responsive element
Pg_chr05_35190T	1153	1193	light responsive element
Pg_chr05_35190T	1974	2014	light responsive element
Pg_chr06_15840T	138	178	light responsive element
Pg_chr06_15840T	1521	1561	light responsive element
Pg_chr06_15840T	1523	1563	light responsive element
Pg_chr06_15840T	1519	1559	light responsive element
Pg_chr06_15840T	1521	1561	light responsive element
Pg_chr06_15840T	1523	1563	light responsive element
Pg_chr06_27140T	557	597	light responsive element
Pg_chr06_27140T	1452	1492	light responsive element
Pg_chr07_19130T	1021	1061	light responsive element
Pg_chr07_19130T	1562	1602	light responsive element
Pg_chr07_26570T	1186	1226	light responsive element
Pg_chr07_26570T	1186	1226	light responsive element
Pg_chr08_00320T	203	243	light responsive element
Pg_chr08_24200T	1068	1108	light responsive element
Pg_chr08_24200T	1421	1461	light responsive element
Pg_chr08_24200T	1584	1624	light responsive element
Pg_chr08_24200T	1584	1624	light responsive element
Pg_chr08_31010T	684	724	light responsive element
Pg_chr08_31010T	766	806	light responsive element
Pg_chr09_28610T	142	182	light responsive element
Pg_chr09_28610T	1162	1202	light responsive element
Pg_chr09_28610T	1196	1236	light responsive element
Pg_chr09_28610T	142	182	light responsive element
Pg_chr09_28610T	1162	1202	light responsive element
Pg_chr09_28610T	1196	1236	light responsive element
Pg_contig00116_02430T	280	320	light responsive element
Pg_contig00116_02430T	623	663	light responsive element
Pg_contig00116_02430T	633	673	light responsive element
Pg_contig00116_02430T	234	274	light responsive element
Pg_contig00116_02430T	623	663	light responsive element
Pg_contig01856_00120T	1215	1255	light responsive element
Pg_contig01856_00120T	1805	1845	light responsive element
Pg_chr01_03120T	169	209	light responsive element
Pg_chr01_03120T	170	210	light responsive element
Pg_chr01_03120T	1439	1479	light responsive element
Pg_chr01_24060T	1872	1912	light responsive element
Pg_chr02_24710T	479	519	light responsive element
Pg_chr02_36690T	923	963	light responsive element
Pg_chr02_36690T	925	965	light responsive element
Pg_chr02_45810T	637	677	light responsive element
Pg_chr02_45810T	1104	1144	light responsive element
Pg_chr02_45810T	1172	1212	light responsive element
Pg_chr02_45810T	1337	1377	light responsive element
Pg_chr02_45810T	1338	1378	light responsive element
Pg_chr02_45820T	724	764	light responsive element
Pg_chr03_05930T	1245	1285	light responsive element
Pg_chr03_13860T	171	211	light responsive element
Pg_chr03_15470T	854	894	light responsive element
Pg_chr03_15470T	1450	1490	light responsive element
Pg_chr03_15470T	1631	1671	light responsive element
Pg_chr03_23670T	40	80	light responsive element
Pg_chr03_29870T	783	823	light responsive element
Pg_chr03_29870T	1637	1677	light responsive element
Pg_chr03_29870T	1454	1494	light responsive element
Pg_chr03_41000T	1089	1129	light responsive element
Pg_chr03_41000T	1101	1141	light responsive element
Pg_chr03_41000T	1847	1887	light responsive element
Pg_chr03_41000T	474	514	light responsive element
Pg_chr03_41000T	643	683	light responsive element
Pg_chr03_41000T	644	684	light responsive element
Pg_chr03_41000T	1548	1588	light responsive element
Pg_chr04_13120T	1340	1380	light responsive element
Pg_chr04_13120T	1438	1478	light responsive element
Pg_chr04_13120T	769	809	light responsive element
Pg_chr04_13120T	1011	1051	light responsive element
Pg_chr04_13120T	1012	1052	light responsive element
Pg_chr04_14910T	1672	1712	light responsive element
Pg_chr04_14910T	24	64	light responsive element
Pg_chr04_14910T	1259	1299	light responsive element
Pg_chr04_14910T	1372	1412	light responsive element
Pg_chr04_14920T	1356	1396	light responsive element
Pg_chr04_14920T	1335	1375	light responsive element
Pg_chr04_14920T	1336	1376	light responsive element
Pg_chr04_14920T	1667	1707	light responsive element
Pg_chr04_16600T	1714	1754	light responsive element
Pg_chr04_17120T	67	107	light responsive element
Pg_chr04_17120T	1697	1737	light responsive element
Pg_chr04_17120T	407	447	light responsive element
Pg_chr04_17120T	408	448	light responsive element
Pg_chr04_17120T	600	640	light responsive element
Pg_chr04_17120T	1460	1500	light responsive element
Pg_chr04_44620T	367	407	light responsive element
Pg_chr04_44620T	641	681	light responsive element
Pg_chr04_44620T	642	682	light responsive element
Pg_chr04_44620T	1239	1279	light responsive element
Pg_chr04_44620T	1678	1718	light responsive element
Pg_chr04_47570T	380	420	light responsive element
Pg_chr04_47570T	911	951	light responsive element
Pg_chr04_47570T	1552	1592	light responsive element
Pg_chr04_47570T	1806	1846	light responsive element
Pg_chr05_11720T	280	320	light responsive element
Pg_chr05_11720T	1015	1055	light responsive element
Pg_chr05_11720T	1016	1056	light responsive element
Pg_chr05_11720T	1445	1485	light responsive element
Pg_chr05_24330T	383	423	light responsive element
Pg_chr05_25760T	1450	1490	light responsive element
Pg_chr05_35190T	667	707	light responsive element
Pg_chr06_01830T	556	596	light responsive element
Pg_chr06_14230T	1902	1942	light responsive element
Pg_chr06_14230T	446	486	light responsive element
Pg_chr06_15840T	210	250	light responsive element
Pg_chr06_15840T	390	430	light responsive element
Pg_chr06_15840T	391	431	light responsive element
Pg_chr06_27120T	10	50	light responsive element
Pg_chr07_00550T	74	114	light responsive element
Pg_chr07_00550T	938	978	light responsive element
Pg_chr07_00550T	1635	1675	light responsive element
Pg_chr07_00550T	1636	1676	light responsive element
Pg_chr07_19130T	1509	1549	light responsive element
Pg_chr07_19130T	1762	1802	light responsive element
Pg_chr07_19130T	1763	1803	light responsive element
Pg_chr07_19130T	874	914	light responsive element
Pg_chr07_29960T	1192	1232	light responsive element
Pg_chr07_29960T	1758	1798	light responsive element
Pg_chr07_29960T	1759	1799	light responsive element
Pg_chr08_00320T	1029	1069	light responsive element
Pg_chr08_00320T	1080	1120	light responsive element
Pg_chr08_24200T	1967	2007	light responsive element
Pg_chr08_24200T	972	1012	light responsive element
Pg_chr08_24200T	974	1014	light responsive element
Pg_chr08_24200T	1698	1738	light responsive element
Pg_chr08_24200T	1765	1805	light responsive element
Pg_chr08_31010T	1036	1076	light responsive element
Pg_chr08_31010T	1422	1462	light responsive element
Pg_chr08_31010T	755	795	light responsive element
Pg_chr09_28610T	740	780	light responsive element
Pg_chr09_28610T	1006	1046	light responsive element
Pg_chr09_28610T	1185	1225	light responsive element
Pg_contig00116_02430T	1825	1865	light responsive element
Pg_contig00116_02430T	676	716	light responsive element
Pg_contig00116_02430T	1820	1860	light responsive element
Pg_contig01856_00120T	1876	1916	light responsive element
Pg_chr01_03120T	293	333	light responsive element
Pg_chr01_03120T	730	770	light responsive element
Pg_chr01_13470T	1065	1105	light responsive element
Pg_chr01_13470T	1089	1129	light responsive element
Pg_chr01_13470T	1107	1147	light responsive element
Pg_chr01_13470T	1116	1156	light responsive element
Pg_chr01_13470T	1179	1219	light responsive element
Pg_chr01_13470T	1333	1373	light responsive element
Pg_chr01_13470T	1532	1572	light responsive element
Pg_chr01_13470T	1601	1641	light responsive element
Pg_chr01_24060T	7	47	light responsive element
Pg_chr01_24060T	292	332	light responsive element
Pg_chr01_24060T	1071	1111	light responsive element
Pg_chr01_24060T	1528	1568	light responsive element
Pg_chr01_36170T	1132	1172	light responsive element
Pg_chr01_36170T	1666	1706	light responsive element
Pg_chr02_21840T	645	685	light responsive element
Pg_chr02_21840T	676	716	light responsive element
Pg_chr02_21840T	682	722	light responsive element
Pg_chr02_21840T	1701	1741	light responsive element
Pg_chr02_24710T	1175	1215	light responsive element
Pg_chr02_26970T	860	900	light responsive element
Pg_chr02_26970T	452	492	light responsive element
Pg_chr02_26970T	1115	1155	light responsive element
Pg_chr02_26970T	1172	1212	light responsive element
Pg_chr02_26970T	1290	1330	light responsive element
Pg_chr02_26970T	1377	1417	light responsive element
Pg_chr02_36690T	784	824	light responsive element
Pg_chr02_36690T	1417	1457	light responsive element
Pg_chr02_36690T	72	112	light responsive element
Pg_chr02_45810T	105	145	light responsive element
Pg_chr02_45810T	616	656	light responsive element
Pg_chr02_45810T	966	1006	light responsive element
Pg_chr02_45820T	1196	1236	light responsive element
Pg_chr02_48740T	162	202	light responsive element
Pg_chr02_48740T	827	867	light responsive element
Pg_chr02_48740T	960	1000	light responsive element
Pg_chr03_05930T	176	216	light responsive element
Pg_chr03_05930T	1199	1239	light responsive element
Pg_chr03_05930T	1971	2011	light responsive element
Pg_chr03_13860T	330	370	light responsive element
Pg_chr03_13860T	408	448	light responsive element
Pg_chr03_13860T	1151	1191	light responsive element
Pg_chr03_13860T	1176	1216	light responsive element
Pg_chr03_13860T	1379	1419	light responsive element
Pg_chr03_13860T	1678	1718	light responsive element
Pg_chr03_13860T	753	793	light responsive element
Pg_chr03_14590T	548	588	light responsive element
Pg_chr03_14590T	594	634	light responsive element
Pg_chr03_14590T	598	638	light responsive element
Pg_chr03_14590T	649	689	light responsive element
Pg_chr03_14590T	844	884	light responsive element
Pg_chr03_14590T	875	915	light responsive element
Pg_chr03_14590T	1183	1223	light responsive element
Pg_chr03_14590T	1464	1504	light responsive element
Pg_chr03_15470T	27	67	light responsive element
Pg_chr03_15470T	1887	1927	light responsive element
Pg_chr03_18510T	911	951	light responsive element
Pg_chr03_18510T	935	975	light responsive element
Pg_chr03_18510T	1184	1224	light responsive element
Pg_chr03_18510T	1245	1285	light responsive element
Pg_chr03_18510T	1487	1527	light responsive element
Pg_chr03_18510T	1572	1612	light responsive element
Pg_chr03_18510T	1851	1891	light responsive element
Pg_chr03_24210T	1783	1823	light responsive element
Pg_chr03_24210T	1959	1999	light responsive element
Pg_chr03_29870T	29	69	light responsive element
Pg_chr03_29870T	76	116	light responsive element
Pg_chr03_29870T	653	693	light responsive element
Pg_chr03_29870T	1786	1826	light responsive element
Pg_chr03_41000T	572	612	light responsive element
Pg_chr03_41000T	1162	1202	light responsive element
Pg_chr03_41000T	1437	1477	light responsive element
Pg_chr04_13120T	544	584	light responsive element
Pg_chr04_13120T	579	619	light responsive element
Pg_chr04_14910T	517	557	light responsive element
Pg_chr04_14910T	1209	1249	light responsive element
Pg_chr04_14920T	976	1016	light responsive element
Pg_chr04_14920T	1021	1061	light responsive element
Pg_chr04_14920T	1652	1692	light responsive element
Pg_chr04_14920T	1687	1727	light responsive element
Pg_chr04_17120T	300	340	light responsive element
Pg_chr04_17120T	1135	1175	light responsive element
Pg_chr04_17120T	1378	1418	light responsive element
Pg_chr04_17120T	1930	1970	light responsive element
Pg_chr04_24190T	743	783	light responsive element
Pg_chr04_24190T	931	971	light responsive element
Pg_chr04_24190T	1512	1552	light responsive element
Pg_chr04_24190T	1807	1847	light responsive element
Pg_chr04_44620T	48	88	light responsive element
Pg_chr04_44620T	60	100	light responsive element
Pg_chr04_47570T	1841	1881	light responsive element
Pg_chr04_47570T	235	275	light responsive element
Pg_chr04_47570T	1672	1712	light responsive element
Pg_chr04_47570T	1955	1995	light responsive element
Pg_chr05_11720T	124	164	light responsive element
Pg_chr05_11720T	1210	1250	light responsive element
Pg_chr05_11720T	1358	1398	light responsive element
Pg_chr05_25760T	788	828	light responsive element
Pg_chr05_25760T	1411	1451	light responsive element
Pg_chr05_25760T	1463	1503	light responsive element
Pg_chr05_25760T	1475	1515	light responsive element
Pg_chr05_25760T	1479	1519	light responsive element
Pg_chr05_35190T	1641	1681	light responsive element
Pg_chr06_01830T	698	738	light responsive element
Pg_chr06_01830T	1255	1295	light responsive element
Pg_chr06_01830T	1327	1367	light responsive element
Pg_chr06_14230T	973	1013	light responsive element
Pg_chr06_15840T	336	376	light responsive element
Pg_chr06_15840T	728	768	light responsive element
Pg_chr06_15840T	860	900	light responsive element
Pg_chr06_15840T	864	904	light responsive element
Pg_chr06_15840T	1651	1691	light responsive element
Pg_chr06_15840T	1876	1916	light responsive element
Pg_chr06_27140T	228	268	light responsive element
Pg_chr06_27140T	256	296	light responsive element
Pg_chr06_27140T	1068	1108	light responsive element
Pg_chr06_27140T	1516	1556	light responsive element
Pg_chr06_27140T	1845	1885	light responsive element
Pg_chr07_00550T	769	809	light responsive element
Pg_chr07_19130T	671	711	light responsive element
Pg_chr07_19130T	199	239	light responsive element
Pg_chr07_19130T	278	318	light responsive element
Pg_chr07_19130T	567	607	light responsive element
Pg_chr07_19130T	658	698	light responsive element
Pg_chr07_26570T	264	304	light responsive element
Pg_chr07_29960T	442	482	light responsive element
Pg_chr08_00320T	645	685	light responsive element
Pg_chr08_00320T	1393	1433	light responsive element
Pg_chr08_00320T	1640	1680	light responsive element
Pg_chr08_00320T	326	366	light responsive element
Pg_chr08_24200T	522	562	light responsive element
Pg_chr08_24200T	747	787	light responsive element
Pg_chr08_24200T	830	870	light responsive element
Pg_chr08_24200T	1847	1887	light responsive element
Pg_chr08_31010T	359	399	light responsive element
Pg_chr09_28610T	1750	1790	light responsive element
Pg_contig00116_02430T	1608	1648	light responsive element
Pg_contig00116_02430T	1790	1830	light responsive element
Pg_contig00116_02430T	1817	1857	light responsive element
Pg_contig00116_02430T	1990	2030	light responsive element
Pg_contig01856_00120T	134	174	light responsive element
Pg_contig01856_00120T	201	241	light responsive element
Pg_chr02_21840T	95	135	light responsiveness
Pg_chr03_05930T	852	892	light responsiveness
Pg_chr03_15470T	1028	1068	light responsiveness
Pg_chr04_14920T	682	722	light responsiveness
Pg_chr04_17120T	654	694	light responsiveness
Pg_chr05_35190T	316	356	light responsiveness
Pg_chr07_19130T	1581	1621	light responsiveness
Pg_chr01_03120T	996	1036	low-temperature responsiveness
Pg_chr01_03120T	1259	1299	low-temperature responsiveness
Pg_chr01_03120T	1359	1399	low-temperature responsiveness
Pg_chr01_03120T	1411	1451	low-temperature responsiveness
Pg_chr01_03120T	1885	1925	low-temperature responsiveness
Pg_chr01_13470T	1834	1874	low-temperature responsiveness
Pg_chr02_26970T	555	595	low-temperature responsiveness
Pg_chr02_26970T	674	714	low-temperature responsiveness
Pg_chr02_36690T	916	956	low-temperature responsiveness
Pg_chr02_45820T	920	960	low-temperature responsiveness
Pg_chr03_13860T	607	647	low-temperature responsiveness
Pg_chr03_13860T	1851	1891	low-temperature responsiveness
Pg_chr03_15470T	41	81	low-temperature responsiveness
Pg_chr03_15470T	149	189	low-temperature responsiveness
Pg_chr03_15470T	1839	1879	low-temperature responsiveness
Pg_chr03_23670T	97	137	low-temperature responsiveness
Pg_chr03_23670T	1050	1090	low-temperature responsiveness
Pg_chr03_41000T	1015	1055	low-temperature responsiveness
Pg_chr03_41000T	1375	1415	low-temperature responsiveness
Pg_chr04_14920T	829	869	low-temperature responsiveness
Pg_chr04_14920T	1957	1997	low-temperature responsiveness
Pg_chr04_14920T	1963	2003	low-temperature responsiveness
Pg_chr04_47570T	767	807	low-temperature responsiveness
Pg_chr06_01830T	951	991	low-temperature responsiveness
Pg_chr06_27120T	1814	1854	low-temperature responsiveness
Pg_chr07_26570T	996	1036	low-temperature responsiveness
Pg_chr08_00320T	792	832	low-temperature responsiveness
Pg_chr08_31010T	372	412	low-temperature responsiveness
Pg_contig00116_02430T	1659	1699	low-temperature responsiveness
Pg_chr01_03120T	52	92	MeJA-responsiveness
Pg_chr01_03120T	683	723	MeJA-responsiveness
Pg_chr01_03120T	1567	1607	MeJA-responsiveness
Pg_chr01_03120T	52	92	MeJA-responsiveness
Pg_chr01_03120T	683	723	MeJA-responsiveness
Pg_chr01_03120T	1567	1607	MeJA-responsiveness
Pg_chr01_36170T	166	206	MeJA-responsiveness
Pg_chr01_36170T	794	834	MeJA-responsiveness
Pg_chr01_36170T	166	206	MeJA-responsiveness
Pg_chr01_36170T	794	834	MeJA-responsiveness
Pg_chr02_21840T	947	987	MeJA-responsiveness
Pg_chr02_21840T	947	987	MeJA-responsiveness
Pg_chr02_24710T	318	358	MeJA-responsiveness
Pg_chr02_24710T	873	913	MeJA-responsiveness
Pg_chr02_24710T	986	1026	MeJA-responsiveness
Pg_chr02_24710T	1703	1743	MeJA-responsiveness
Pg_chr02_24710T	318	358	MeJA-responsiveness
Pg_chr02_24710T	873	913	MeJA-responsiveness
Pg_chr02_24710T	986	1026	MeJA-responsiveness
Pg_chr02_24710T	1703	1743	MeJA-responsiveness
Pg_chr02_26970T	236	276	MeJA-responsiveness
Pg_chr02_26970T	625	665	MeJA-responsiveness
Pg_chr02_26970T	755	795	MeJA-responsiveness
Pg_chr02_26970T	236	276	MeJA-responsiveness
Pg_chr02_26970T	625	665	MeJA-responsiveness
Pg_chr02_26970T	755	795	MeJA-responsiveness
Pg_chr02_45810T	1677	1717	MeJA-responsiveness
Pg_chr02_45810T	1677	1717	MeJA-responsiveness
Pg_chr02_48740T	1235	1275	MeJA-responsiveness
Pg_chr02_48740T	1235	1275	MeJA-responsiveness
Pg_chr03_05930T	824	864	MeJA-responsiveness
Pg_chr03_05930T	824	864	MeJA-responsiveness
Pg_chr03_14590T	183	223	MeJA-responsiveness
Pg_chr03_14590T	183	223	MeJA-responsiveness
Pg_chr03_15470T	117	157	MeJA-responsiveness
Pg_chr03_15470T	1326	1366	MeJA-responsiveness
Pg_chr03_15470T	1366	1406	MeJA-responsiveness
Pg_chr03_15470T	117	157	MeJA-responsiveness
Pg_chr03_15470T	1326	1366	MeJA-responsiveness
Pg_chr03_15470T	1366	1406	MeJA-responsiveness
Pg_chr03_23670T	1119	1159	MeJA-responsiveness
Pg_chr03_23670T	1304	1344	MeJA-responsiveness
Pg_chr03_23670T	1954	1994	MeJA-responsiveness
Pg_chr03_23670T	1119	1159	MeJA-responsiveness
Pg_chr03_23670T	1304	1344	MeJA-responsiveness
Pg_chr03_23670T	1954	1994	MeJA-responsiveness
Pg_chr03_24210T	494	534	MeJA-responsiveness
Pg_chr03_24210T	1165	1205	MeJA-responsiveness
Pg_chr03_24210T	1225	1265	MeJA-responsiveness
Pg_chr03_24210T	494	534	MeJA-responsiveness
Pg_chr03_24210T	1165	1205	MeJA-responsiveness
Pg_chr03_24210T	1225	1265	MeJA-responsiveness
Pg_chr03_41000T	217	257	MeJA-responsiveness
Pg_chr03_41000T	217	257	MeJA-responsiveness
Pg_chr04_13120T	1114	1154	MeJA-responsiveness
Pg_chr04_13120T	1354	1394	MeJA-responsiveness
Pg_chr04_13120T	1114	1154	MeJA-responsiveness
Pg_chr04_13120T	1354	1394	MeJA-responsiveness
Pg_chr04_14910T	370	410	MeJA-responsiveness
Pg_chr04_14910T	370	410	MeJA-responsiveness
Pg_chr04_14920T	85	125	MeJA-responsiveness
Pg_chr04_14920T	267	307	MeJA-responsiveness
Pg_chr04_14920T	796	836	MeJA-responsiveness
Pg_chr04_14920T	85	125	MeJA-responsiveness
Pg_chr04_14920T	267	307	MeJA-responsiveness
Pg_chr04_14920T	796	836	MeJA-responsiveness
Pg_chr04_16600T	674	714	MeJA-responsiveness
Pg_chr04_16600T	674	714	MeJA-responsiveness
Pg_chr04_17120T	461	501	MeJA-responsiveness
Pg_chr04_17120T	474	514	MeJA-responsiveness
Pg_chr04_17120T	1833	1873	MeJA-responsiveness
Pg_chr04_17120T	461	501	MeJA-responsiveness
Pg_chr04_17120T	474	514	MeJA-responsiveness
Pg_chr04_17120T	1833	1873	MeJA-responsiveness
Pg_chr04_24190T	1416	1456	MeJA-responsiveness
Pg_chr04_24190T	1416	1456	MeJA-responsiveness
Pg_chr04_47570T	892	932	MeJA-responsiveness
Pg_chr04_47570T	1427	1467	MeJA-responsiveness
Pg_chr04_47570T	1777	1817	MeJA-responsiveness
Pg_chr04_47570T	892	932	MeJA-responsiveness
Pg_chr04_47570T	1427	1467	MeJA-responsiveness
Pg_chr04_47570T	1777	1817	MeJA-responsiveness
Pg_chr05_11720T	60	100	MeJA-responsiveness
Pg_chr05_11720T	730	770	MeJA-responsiveness
Pg_chr05_11720T	60	100	MeJA-responsiveness
Pg_chr05_11720T	730	770	MeJA-responsiveness
Pg_chr05_25760T	1	41	MeJA-responsiveness
Pg_chr05_25760T	1246	1286	MeJA-responsiveness
Pg_chr05_25760T	1	41	MeJA-responsiveness
Pg_chr05_25760T	1246	1286	MeJA-responsiveness
Pg_chr05_35190T	1381	1421	MeJA-responsiveness
Pg_chr05_35190T	1489	1529	MeJA-responsiveness
Pg_chr05_35190T	1528	1568	MeJA-responsiveness
Pg_chr05_35190T	1381	1421	MeJA-responsiveness
Pg_chr05_35190T	1489	1529	MeJA-responsiveness
Pg_chr05_35190T	1528	1568	MeJA-responsiveness
Pg_chr06_01830T	1263	1303	MeJA-responsiveness
Pg_chr06_01830T	1263	1303	MeJA-responsiveness
Pg_chr06_14230T	1976	2016	MeJA-responsiveness
Pg_chr06_14230T	1976	2016	MeJA-responsiveness
Pg_chr06_15840T	1726	1766	MeJA-responsiveness
Pg_chr06_15840T	1726	1766	MeJA-responsiveness
Pg_chr06_27120T	1864	1904	MeJA-responsiveness
Pg_chr06_27120T	1864	1904	MeJA-responsiveness
Pg_chr06_27140T	450	490	MeJA-responsiveness
Pg_chr06_27140T	1493	1533	MeJA-responsiveness
Pg_chr06_27140T	450	490	MeJA-responsiveness
Pg_chr06_27140T	1493	1533	MeJA-responsiveness
Pg_chr07_00550T	1039	1079	MeJA-responsiveness
Pg_chr07_00550T	1870	1910	MeJA-responsiveness
Pg_chr07_00550T	1039	1079	MeJA-responsiveness
Pg_chr07_00550T	1870	1910	MeJA-responsiveness
Pg_chr07_19130T	119	159	MeJA-responsiveness
Pg_chr07_19130T	119	159	MeJA-responsiveness
Pg_chr07_26570T	196	236	MeJA-responsiveness
Pg_chr07_26570T	1049	1089	MeJA-responsiveness
Pg_chr07_26570T	1081	1121	MeJA-responsiveness
Pg_chr07_26570T	196	236	MeJA-responsiveness
Pg_chr07_26570T	1049	1089	MeJA-responsiveness
Pg_chr07_26570T	1081	1121	MeJA-responsiveness
Pg_chr08_24200T	675	715	MeJA-responsiveness
Pg_chr08_24200T	791	831	MeJA-responsiveness
Pg_chr08_24200T	675	715	MeJA-responsiveness
Pg_chr08_24200T	791	831	MeJA-responsiveness
Pg_chr08_31010T	686	726	MeJA-responsiveness
Pg_chr08_31010T	765	805	MeJA-responsiveness
Pg_chr08_31010T	1374	1414	MeJA-responsiveness
Pg_chr08_31010T	1457	1497	MeJA-responsiveness
Pg_chr08_31010T	1744	1784	MeJA-responsiveness
Pg_chr08_31010T	686	726	MeJA-responsiveness
Pg_chr08_31010T	765	805	MeJA-responsiveness
Pg_chr08_31010T	1374	1414	MeJA-responsiveness
Pg_chr08_31010T	1457	1497	MeJA-responsiveness
Pg_chr08_31010T	1744	1784	MeJA-responsiveness
Pg_chr09_28610T	558	598	MeJA-responsiveness
Pg_chr09_28610T	700	740	MeJA-responsiveness
Pg_chr09_28610T	822	862	MeJA-responsiveness
Pg_chr09_28610T	558	598	MeJA-responsiveness
Pg_chr09_28610T	700	740	MeJA-responsiveness
Pg_chr09_28610T	822	862	MeJA-responsiveness
Pg_contig01856_00120T	1176	1216	MeJA-responsiveness
Pg_contig01856_00120T	1176	1216	MeJA-responsiveness
Pg_chr01_13470T	1984	2024	meristem expression
Pg_chr01_24060T	927	967	meristem expression
Pg_chr01_36170T	636	676	meristem expression
Pg_chr02_21840T	560	600	meristem expression
Pg_chr02_24710T	1004	1044	meristem expression
Pg_chr02_36690T	1069	1109	meristem expression
Pg_chr02_45820T	711	751	meristem expression
Pg_chr02_48740T	1316	1356	meristem expression
Pg_chr02_48740T	1549	1589	meristem expression
Pg_chr03_18510T	427	467	meristem expression
Pg_chr03_23670T	1071	1111	meristem expression
Pg_chr03_24210T	1149	1189	meristem expression
Pg_chr03_24210T	1265	1305	meristem expression
Pg_chr04_14910T	773	813	meristem expression
Pg_chr04_24190T	492	532	meristem expression
Pg_chr06_01830T	16	56	meristem expression
Pg_chr06_01830T	865	905	meristem expression
Pg_chr07_29960T	1628	1668	meristem expression
Pg_chr07_29960T	1720	1760	meristem expression
Pg_contig01856_00120T	1814	1854	meristem expression
Pg_chr01_03120T	1919	1959	MYB binding site involved in drought-inducibility
Pg_chr01_13470T	1778	1818	MYB binding site involved in drought-inducibility
Pg_chr01_24060T	110	150	MYB binding site involved in drought-inducibility
Pg_chr01_24060T	1001	1041	MYB binding site involved in drought-inducibility
Pg_chr02_45820T	1617	1657	MYB binding site involved in drought-inducibility
Pg_chr02_45820T	1719	1759	MYB binding site involved in drought-inducibility
Pg_chr02_45820T	1748	1788	MYB binding site involved in drought-inducibility
Pg_chr03_14590T	1312	1352	MYB binding site involved in drought-inducibility
Pg_chr03_23670T	294	334	MYB binding site involved in drought-inducibility
Pg_chr03_23670T	1928	1968	MYB binding site involved in drought-inducibility
Pg_chr03_24210T	1936	1976	MYB binding site involved in drought-inducibility
Pg_chr03_29870T	391	431	MYB binding site involved in drought-inducibility
Pg_chr04_13120T	170	210	MYB binding site involved in drought-inducibility
Pg_chr04_14920T	133	173	MYB binding site involved in drought-inducibility
Pg_chr04_14920T	1708	1748	MYB binding site involved in drought-inducibility
Pg_chr04_16600T	397	437	MYB binding site involved in drought-inducibility
Pg_chr04_16600T	735	775	MYB binding site involved in drought-inducibility
Pg_chr04_16600T	1106	1146	MYB binding site involved in drought-inducibility
Pg_chr04_16600T	1206	1246	MYB binding site involved in drought-inducibility
Pg_chr04_17120T	266	306	MYB binding site involved in drought-inducibility
Pg_chr04_17120T	504	544	MYB binding site involved in drought-inducibility
Pg_chr04_17120T	1714	1754	MYB binding site involved in drought-inducibility
Pg_chr04_24190T	1328	1368	MYB binding site involved in drought-inducibility
Pg_chr05_24330T	1679	1719	MYB binding site involved in drought-inducibility
Pg_chr06_01830T	1785	1825	MYB binding site involved in drought-inducibility
Pg_chr06_14230T	1173	1213	MYB binding site involved in drought-inducibility
Pg_chr06_15840T	530	570	MYB binding site involved in drought-inducibility
Pg_chr06_27140T	1919	1959	MYB binding site involved in drought-inducibility
Pg_chr07_29960T	672	712	MYB binding site involved in drought-inducibility
Pg_chr08_00320T	311	351	MYB binding site involved in drought-inducibility
Pg_chr08_00320T	1871	1911	MYB binding site involved in drought-inducibility
Pg_chr08_24200T	1313	1353	MYB binding site involved in drought-inducibility
Pg_chr08_31010T	117	157	MYB binding site involved in drought-inducibility
Pg_contig00116_02430T	1719	1759	MYB binding site involved in drought-inducibility
Pg_chr01_24060T	1409	1449	MYB binding site involved in flavonoid biosynthetic genes regulation
Pg_chr03_18510T	1980	2020	MYB binding site involved in flavonoid biosynthetic genes regulation
Pg_chr05_25760T	589	629	MYB binding site involved in flavonoid biosynthetic genes regulation
Pg_chr02_24710T	1442	1482	MYB binding site involved in light responsiveness
Pg_chr03_05930T	201	241	MYB binding site involved in light responsiveness
Pg_chr03_13860T	394	434	MYB binding site involved in light responsiveness
Pg_chr03_13860T	472	512	MYB binding site involved in light responsiveness
Pg_chr03_15470T	972	1012	MYB binding site involved in light responsiveness
Pg_chr04_14910T	788	828	MYB binding site involved in light responsiveness
Pg_chr04_16600T	905	945	MYB binding site involved in light responsiveness
Pg_chr04_24190T	1733	1773	MYB binding site involved in light responsiveness
Pg_chr05_24330T	1032	1072	MYB binding site involved in light responsiveness
Pg_chr06_01830T	1653	1693	MYB binding site involved in light responsiveness
Pg_chr06_15840T	175	215	MYB binding site involved in light responsiveness
Pg_chr07_00550T	1911	1951	MYB binding site involved in light responsiveness
Pg_chr07_26570T	130	170	MYB binding site involved in light responsiveness
Pg_chr07_26570T	638	678	MYB binding site involved in light responsiveness
Pg_chr07_26570T	1691	1731	MYB binding site involved in light responsiveness
Pg_chr07_29960T	261	301	MYB binding site involved in light responsiveness
Pg_chr09_28610T	64	104	MYB binding site involved in light responsiveness
Pg_chr01_24060T	1581	1621	salicylic acid responsiveness
Pg_chr01_36170T	1761	1801	salicylic acid responsiveness
Pg_chr02_21840T	1628	1668	salicylic acid responsiveness
Pg_chr02_21840T	1928	1968	salicylic acid responsiveness
Pg_chr02_26970T	287	327	salicylic acid responsiveness
Pg_chr02_26970T	1932	1972	salicylic acid responsiveness
Pg_chr02_26970T	1987	2027	salicylic acid responsiveness
Pg_chr03_14590T	1268	1308	salicylic acid responsiveness
Pg_chr03_18510T	663	703	salicylic acid responsiveness
Pg_chr03_23670T	1357	1397	salicylic acid responsiveness
Pg_chr03_24210T	81	121	salicylic acid responsiveness
Pg_chr03_29870T	861	901	salicylic acid responsiveness
Pg_chr04_14910T	311	351	salicylic acid responsiveness
Pg_chr04_14910T	895	935	salicylic acid responsiveness
Pg_chr04_14920T	611	651	salicylic acid responsiveness
Pg_chr04_16600T	597	637	salicylic acid responsiveness
Pg_chr04_17120T	23	63	salicylic acid responsiveness
Pg_chr04_44620T	1476	1516	salicylic acid responsiveness
Pg_chr05_24330T	1135	1175	salicylic acid responsiveness
Pg_chr05_24330T	1695	1735	salicylic acid responsiveness
Pg_chr06_01830T	1911	1951	salicylic acid responsiveness
Pg_chr07_26570T	1908	1948	salicylic acid responsiveness
Pg_chr08_00320T	760	800	salicylic acid responsiveness
Pg_contig00116_02430T	1343	1383	salicylic acid responsiveness
Pg_contig00116_02430T	1403	1443	salicylic acid responsiveness
Pg_contig01856_00120T	1340	1380	salicylic acid responsiveness
Pg_chr02_26970T	995	1035	seed-specific regulatory element
Pg_chr02_26970T	999	1039	seed-specific regulatory element
Pg_chr04_14920T	858	898	seed-specific regulatory element
