# Supplementary material for: Genome-wide identification of bZIP transcription factors and their expression analysis in Platycodon grandiflorus under abiotic stress
Source: Front Plant Sci. 2024 May 28;15:1403220. doi: 10.3389/fpls.2024.1403220 (PMC11165138; doi:10.3389/fpls.2024.1403220)
Supplement: Supplementary file 4 [file Table_4.xlsx]

## Sheet: Sheet1
Synteny analysis of bZIP genes between P.grandiflorus and M. domestica, V. vinifera, S. lycopersicum, C. sativa, C. lanceolata, O. sativa.
P.grandiflorus and C. sativa						P.grandiflorus and S. lycopersicum						P.grandiflorus and M. domestica						P.grandiflorus and V. vinifera						P.grandiflorus and V. vinifera						P.grandiflorus and C. lanceolata
Chr	gene name		Chr	gene name		Chr	gene name		Chr	gene name		Chr	gene name		Chr	gene name		Chr	gene name		Chr	gene name		Chr	gene name		Chr	gene name		Chr	gene name		Chr	gene name
NC_044370.1	rna-XM_030630405.1	==	Pg_chr02	Pg_chr02_24710T		NC_015438.3	rna-XM_004229926.3	==	Pg_chr01	Pg_chr01_03120T		NC_041789.1	rna-XM_008361600.3	==	Pg_chr01	Pg_chr01_13470T		NC_012007.3	rna-XM_019220885.1	==	Pg_chr02	Pg_chr02_48740T		1	transcript:Os01t0658900-01	==	Pg_chr01	Pg_chr01_03120T		Cl_chr01	Cl_chr01_17400T	==	Pg_chr02	Pg_chr02_45810T
NC_044370.1	rna-XM_030628914.1	==	Pg_chr02	Pg_chr02_21840T		NC_015438.3	rna-NM_001246936.2	==	Pg_chr02	Pg_chr02_21840T		NC_041789.1	rna-XM_029099212.1	==	Pg_chr01	Pg_chr01_03120T		NC_012008.3	rna-XM_002274719.3	==	Pg_chr01	Pg_chr01_03120T		1	transcript:Os01t0859300-01	==	Pg_chr06	Pg_chr06_27140T		Cl_chr01	Cl_chr01_28540T	==	Pg_chr04	Pg_chr04_44620T
NC_044370.1	rna-XM_030630405.1	==	Pg_chr03	Pg_chr03_29870T		NC_015438.3	rna-XM_004230730.4	==	Pg_chr03	Pg_chr03_29870T		NC_041789.1	rna-XM_017333114.2	==	Pg_chr04	Pg_chr04_14920T		NC_012008.3	rna-XM_002276589.3	==	Pg_chr04	Pg_chr04_13120T		1	transcript:Os01t0859500-01	==	Pg_chr06	Pg_chr06_27120T		Cl_chr01	Cl_chr01_53160T	==	Pg_chr07	Pg_chr07_19130T
NC_044370.1	rna-XM_030629686.1	==	Pg_chr04	Pg_chr04_14920T		NC_015438.3	rna-XM_004230853.4	==	Pg_chr05	Pg_chr05_35190T		NC_041789.1	rna-XM_008361600.3	==	Pg_chr06	Pg_chr06_14230T		NC_012008.3	rna-XM_002274719.3	==	Pg_chr08	Pg_chr08_31010T		2	transcript:Os02t0766700-01	==	Pg_chr03	Pg_chr03_29870T		Cl_chr02	Cl_chr02_32480T	==	Pg_chr02	Pg_chr02_36690T
NC_044370.1	rna-XM_030637249.1	==	Pg_chr04	Pg_chr04_16600T		NC_015438.3	rna-XM_004230547.4	==	Pg_chr05	Pg_chr05_11720T		NC_041789.1	rna-XM_008377895.3	==	Pg_chr07	Pg_chr07_00550T		NC_012009.3	rna-XM_002283631.3	==	Pg_chr02	Pg_chr02_21840T		3	transcript:Os03t0336200-01	==	Pg_chr01	Pg_chr01_13470T		Cl_chr02	Cl_chr02_19860T	==	Pg_chr02	Pg_chr02_26970T
NC_044370.1	rna-XM_030633207.1	==	Pg_chr06	Pg_chr06_01830T		NC_015438.3	rna-NM_001247410.2	==	Pg_chr06	Pg_chr06_01830T		NC_041789.1	rna-XM_029099212.1	==	Pg_chr08	Pg_chr08_31010T		NC_012009.3	rna-XM_003631565.3	==	Pg_chr02	Pg_chr02_24710T		9	transcript:Os09t0456200-01	==	Pg_chr03	Pg_chr03_29870T		Cl_chr03	Cl_chr03_45920T	==	Pg_chr01	Pg_chr01_13470T
NC_044371.1	rna-XM_030634608.1	==	Pg_chr01	Pg_chr01_13470T		NC_015438.3	rna-XM_004230994.3	==	Pg_chr08	Pg_chr08_00320T		NC_041790.1	rna-XM_029090910.1	==	Pg_chr02	Pg_chr02_21840T		NC_012009.3	rna-XM_003631565.3	==	Pg_chr03	Pg_chr03_29870T		9	transcript:Os09t0540800-01	==	Pg_chr04	Pg_chr04_44620T		Cl_chr03	Cl_chr03_54150T	==	Pg_chr01	Pg_chr01_03120T
NC_044371.1	rna-XM_030633372.1	==	Pg_chr08	Pg_chr08_31010T		NC_015438.3	rna-XM_004229926.3	==	Pg_chr08	Pg_chr08_31010T		NC_041791.1	rna-XM_008388006.3	==	Pg_chr03	Pg_chr03_41000T		NC_012009.3	rna-XM_010649257.2	==	Pg_chr05	Pg_chr05_35190T								Cl_chr04	Cl_chr04_25590T	==	Pg_chr03	Pg_chr03_41000T
NC_044372.1	rna-XM_030638280.1	==	Pg_chr03	Pg_chr03_24210T		NC_015439.3	rna-XM_010317895.3	==	Pg_chr01	Pg_chr01_24060T		NC_041791.1	rna-XM_008385717.3	==	Pg_chr03	Pg_chr03_23670T		NC_012009.3	rna-XM_002278800.3	==	Pg_chr08	Pg_chr08_00320T								Cl_chr04	Cl_chr04_27600T	==	Pg_chr03	Pg_chr03_05930T
NC_044374.1	rna-XM_030644903.1	==	Pg_chr01	Pg_chr01_03120T		NC_015439.3	rna-XM_019211977.2	==	Pg_chr01	Pg_chr01_36170T		NC_041791.1	rna-XM_008357274.3	==	Pg_chr06	Pg_chr06_01830T		NC_012010.3	rna-XM_002276043.3	==	Pg_chr02	Pg_chr02_21840T								Cl_chr04	Cl_chr04_16330T	==	Pg_chr03	Pg_chr03_29870T
NC_044374.1	rna-XM_030644903.1	==	Pg_chr08	Pg_chr08_31010T		NC_015439.3	rna-NM_001329546.1	==	Pg_chr01	Pg_chr01_36170T		NC_041791.1	rna-XM_008385717.3	==	Pg_chr06	Pg_chr06_27140T		NC_012010.3	rna-XM_010650346.2	==	Pg_chr07	Pg_chr07_29960T								Cl_chr04	Cl_chr04_07370T	==	Pg_chr03	Pg_chr03_23670T
NC_044375.1	rna-XM_030650104.1	==	Pg_chr06	Pg_chr06_14230T		NC_015439.3	rna-XM_004232387.4	==	Pg_chr02	Pg_chr02_21840T		NC_041791.1	rna-XM_008385721.3	==	Pg_chr06	Pg_chr06_27120T		NC_012011.3	rna-XM_010651224.2	==	Pg_chr06	Pg_chr06_01830T								Cl_chr04	Cl_chr04_07190T	==	Pg_chr03	Pg_chr03_24210T
NC_044375.1	rna-XM_030650467.1	==	Pg_chr06	Pg_chr06_27140T		NC_015440.3	rna-XM_019212710.2	==	Pg_chr01	Pg_chr01_24060T		NC_041793.1	rna-XM_008374912.3	==	Pg_chr02	Pg_chr02_24710T		NC_012011.3	rna-XM_010651224.2	==	Pg_chr07	Pg_chr07_19130T								Cl_chr05	Cl_chr05_44830T	==	Pg_chr02	Pg_chr02_24710T
NC_044375.1	rna-XM_030647309.1	==	Pg_chr06	Pg_chr06_27120T		NC_015441.3	rna-XM_004238251.4	==	Pg_chr02	Pg_chr02_21840T		NC_041793.1	rna-XM_008374912.3	==	Pg_chr03	Pg_chr03_29870T		NC_012012.3	rna-XM_019220436.1	==	Pg_chr06	Pg_chr06_15840T								Cl_chr05	Cl_chr05_33300T	==	Pg_chr05	Pg_chr05_11720T
NC_044377.1	rna-XM_030654763.1	==	Pg_chr02	Pg_chr02_21840T		NC_015441.3	rna-XM_010321757.3	==	Pg_chr02	Pg_chr02_24710T		NC_041793.1	rna-XM_017323306.2	==	Pg_chr04	Pg_chr04_17120T		NC_012012.3	rna-XM_002266756.3	==	Pg_chr06	Pg_chr06_14230T								Cl_chr05	Cl_chr05_13760T	==	Pg_chr05	Pg_chr05_35190T
NC_044377.1	rna-XM_030654387.1	==	Pg_chr05	Pg_chr05_35190T		NC_015441.3	rna-XM_004238421.3	==	Pg_chr04	Pg_chr04_47570T		NC_041793.1	rna-XM_008340871.3	==	Pg_chr04	Pg_chr04_16600T		NC_012012.3	rna-XM_002274392.3	==	Pg_chr06	Pg_chr06_27140T								Cl_chr06	Cl_chr06_38260T	==	Pg_chr06	Pg_chr06_01830T
NC_044378.1	rna-XM_030623828.1	==	Pg_chr03	Pg_chr03_41000T		NC_015441.3	rna-XM_004237729.3	==	Pg_chr04	Pg_chr04_17120T		NC_041793.1	rna-XM_029103400.1	==	Pg_chr05	Pg_chr05_35190T		NC_012012.3	rna-XM_002276031.3	==	Pg_chr06	Pg_chr06_27120T								Cl_chr06	Cl_chr06_30640T	==	Pg_chr06	Pg_chr06_15840T
NC_044379.1	rna-XM_030626192.1	==	Pg_chr01	Pg_chr01_24060T		NC_015441.3	rna-XM_004237748.4	==	Pg_chr04	Pg_chr04_16600T		NC_041793.1	rna-XM_008379516.3	==	Pg_chr08	Pg_chr08_00320T		NC_012013.3	rna-XM_002276449.4	==	Pg_chr06	Pg_chr06_01830T								Cl_chr06	Cl_chr06_30810T	==	Pg_chr06	Pg_chr06_14230T
NC_044379.1	rna-XM_030625811.1	==	Pg_chr01	Pg_chr01_24060T		NC_015441.3	rna-NM_001247685.2	==	Pg_chr04	Pg_chr04_14920T		NC_041794.1	rna-XM_008362692.3	==	Pg_chr01	Pg_chr01_24060T		NC_012013.3	rna-XM_002276449.4	==	Pg_chr07	Pg_chr07_19130T								Cl_chr06	Cl_chr06_38260T	==	Pg_chr07	Pg_chr07_19130T
NC_044379.1	rna-XM_030625958.1	==	Pg_chr02	Pg_chr02_48740T		NC_015441.3	rna-NM_001247685.2	==	Pg_chr07	Pg_chr07_00550T		NC_041794.1	rna-XM_008394240.3	==	Pg_chr01	Pg_chr01_03120T		NC_012013.3	rna-XM_019221072.1	==	Pg_chr07	Pg_chr07_00550T								Cl_chr07	Cl_chr07_06410T	==	Pg_chr01	Pg_chr01_03120T
NC_044379.1	rna-XM_030625811.1	==	Pg_chr02	Pg_chr02_45810T		NC_015442.3	rna-XM_004239373.4	==	Pg_chr02	Pg_chr02_48740T		NC_041794.1	rna-XM_008375115.3	==	Pg_chr04	Pg_chr04_47570T		NC_012014.3	rna-XM_002275111.3	==	Pg_chr03	Pg_chr03_05930T								Cl_chr07	Cl_chr07_06410T	==	Pg_chr08	Pg_chr08_31010T
NC_044379.1	rna-XM_030626076.1	==	Pg_chr03	Pg_chr03_05930T		NC_015443.3	rna-XM_004240817.4	==	Pg_chr01	Pg_chr01_13470T		NC_041794.1	rna-XM_008394240.3	==	Pg_chr08	Pg_chr08_31010T		NC_012014.3	rna-XM_010655778.2	==	Pg_chr03	Pg_chr03_23670T								Cl_chr07	Cl_chr07_21570T	==	Pg_chr08	Pg_chr08_00320T
						NC_015443.3	rna-XM_010324133.3	==	Pg_chr06	Pg_chr06_27120T		NC_041795.1	rna-XM_008371148.3	==	Pg_chr01	Pg_chr01_13470T		NC_012014.3	rna-XM_019221817.1	==	Pg_chr03	Pg_chr03_24210T
						NC_015443.3	rna-XM_004240524.4	==	Pg_chr06	Pg_chr06_01830T		NC_041795.1	rna-XM_029105726.1	==	Pg_chr01	Pg_chr01_03120T		NC_012018.3	rna-XM_002275876.3	==	Pg_chr03	Pg_chr03_41000T
						NC_015443.3	rna-XM_004242504.1	==	Pg_chr06	Pg_chr06_15840T		NC_041795.1	rna-XM_008371148.3	==	Pg_chr06	Pg_chr06_14230T		NC_012018.3	rna-XM_002266308.3	==	Pg_chr05	Pg_chr05_11720T
						NC_015444.3	rna-XM_004244208.4	==	Pg_chr03	Pg_chr03_41000T		NC_041795.1	rna-XM_029105726.1	==	Pg_chr08	Pg_chr08_31010T		NC_012019.3	rna-XM_010659877.2	==	Pg_chr06	Pg_chr06_14230T
						NC_015445.3	rna-XM_004244362.3	==	Pg_chr04	Pg_chr04_13120T		NC_041796.1	rna-XM_008378979.3	==	Pg_chr02	Pg_chr02_21840T		NC_012020.3	rna-XM_002278702.3	==	Pg_chr01	Pg_chr01_24060T
						NC_015445.3	rna-NM_001247891.2	==	Pg_chr07	Pg_chr07_26570T		NC_041796.1	rna-XM_008379726.3	==	Pg_chr02	Pg_chr02_26970T		NC_012021.3	rna-XM_002279930.4	==	Pg_chr01	Pg_chr01_03120T
						NC_015446.3	rna-XM_010327616.3	==	Pg_chr03	Pg_chr03_23670T		NC_041796.1	rna-XM_008379817.3	==	Pg_chr02	Pg_chr02_24710T		NC_012021.3	rna-XM_002279930.4	==	Pg_chr08	Pg_chr08_31010T
						NC_015446.3	rna-XM_019215463.2	==	Pg_chr03	Pg_chr03_24210T		NC_041796.1	rna-XM_008379817.3	==	Pg_chr03	Pg_chr03_29870T		NC_012024.3	rna-XM_003634324.3	==	Pg_chr02	Pg_chr02_21840T
						NC_015447.3	rna-XM_010329109.3	==	Pg_chr08	Pg_chr08_00320T		NC_041796.1	rna-XM_008380296.3	==	Pg_chr04	Pg_chr04_14920T		NC_012024.3	rna-XM_010666186.2	==	Pg_chr02	Pg_chr02_26970T
						NC_015449.3	rna-XM_004252503.3	==	Pg_chr04	Pg_chr04_14920T		NC_041796.1	rna-XM_008366993.2	==	Pg_chr04	Pg_chr04_14910T		NC_012024.3	rna-XM_010665762.2	==	Pg_chr02	Pg_chr02_24710T
												NC_041796.1	rna-XM_008367053.3	==	Pg_chr05	Pg_chr05_11720T		NC_012024.3	rna-XM_010665762.2	==	Pg_chr03	Pg_chr03_29870T
												NC_041796.1	rna-NM_001293823.1	==	Pg_chr07	Pg_chr07_29960T		NC_012024.3	rna-XM_002279232.3	==	Pg_chr04	Pg_chr04_44620T
												NC_041797.1	rna-XM_008381253.3	==	Pg_chr01	Pg_chr01_24060T		NC_012024.3	rna-XM_002266790.3	==	Pg_chr04	Pg_chr04_16600T
												NC_041798.1	rna-XM_008379038.3	==	Pg_chr02	Pg_chr02_21840T		NC_012024.3	rna-XM_003634288.3	==	Pg_chr04	Pg_chr04_47570T
												NC_041798.1	rna-XM_008383586.3	==	Pg_chr04	Pg_chr04_17120T		NC_012024.3	rna-XM_002285784.4	==	Pg_chr04	Pg_chr04_14920T
												NC_041798.1	rna-XM_008383603.3	==	Pg_chr04	Pg_chr04_16600T		NC_012024.3	rna-XM_019216420.1	==	Pg_chr04	Pg_chr04_14910T
												NC_041798.1	rna-XM_029109745.1	==	Pg_chr08	Pg_chr08_00320T		NC_012024.3	rna-XM_002280506.3	==	Pg_chr05	Pg_chr05_35190T
												NC_041799.1	rna-XM_029089053.1	==	Pg_chr03	Pg_chr03_41000T		NC_012025.3	rna-XM_002285275.4	==	Pg_chr03	Pg_chr03_41000T
												NC_041799.1	rna-XM_008386444.3	==	Pg_chr06	Pg_chr06_14230T
												NC_041799.1	rna-XM_029087753.1	==	Pg_chr06	Pg_chr06_01830T
												NC_041799.1	rna-XM_008392888.3	==	Pg_chr06	Pg_chr06_27120T
												NC_041800.1	rna-XM_029090385.1	==	Pg_chr03	Pg_chr03_24210T
												NC_041800.1	rna-XM_029090820.1	==	Pg_chr03	Pg_chr03_23670T
												NC_041800.1	rna-XM_008353565.3	==	Pg_chr03	Pg_chr03_05930T
												NC_041800.1	rna-XM_029090809.1	==	Pg_chr03	Pg_chr03_23670T
												NC_041801.1	rna-XM_008352645.3	==	Pg_chr02	Pg_chr02_48740T
												NC_041801.1	rna-NM_001329018.1	==	Pg_chr02	Pg_chr02_45810T
												NC_041802.1	rna-XM_008395159.3	==	Pg_chr01	Pg_chr01_24060T
												NC_041802.1	rna-XM_029092903.1	==	Pg_chr01	Pg_chr01_03120T
												NC_041802.1	rna-XM_008369083.3	==	Pg_chr03	Pg_chr03_24210T
												NC_041802.1	rna-XM_029093156.1	==	Pg_chr03	Pg_chr03_23670T
												NC_041802.1	rna-XM_008369147.3	==	Pg_chr03	Pg_chr03_05930T
												NC_041802.1	rna-XM_029093156.1	==	Pg_chr06	Pg_chr06_27140T
												NC_041802.1	rna-XM_029092903.1	==	Pg_chr08	Pg_chr08_31010T
												NC_041803.1	rna-XM_008395231.3	==	Pg_chr01	Pg_chr01_36170T
												NC_041803.1	rna-NM_001294360.1	==	Pg_chr02	Pg_chr02_21840T
												NC_041803.1	rna-XM_008339925.3	==	Pg_chr02	Pg_chr02_26970T
												NC_041803.1	rna-XM_008395480.3	==	Pg_chr02	Pg_chr02_26970T
												NC_041803.1	rna-XM_029094247.1	==	Pg_chr02	Pg_chr02_24710T
												NC_041803.1	rna-XM_029094247.1	==	Pg_chr03	Pg_chr03_29870T
												NC_041803.1	rna-XM_008354390.3	==	Pg_chr04	Pg_chr04_14920T
												NC_041803.1	rna-XM_029093288.1	==	Pg_chr04	Pg_chr04_44620T
												NC_041803.1	rna-XM_008340578.3	==	Pg_chr04	Pg_chr04_14920T
												NC_041803.1	rna-XM_008339760.3	==	Pg_chr04	Pg_chr04_44620T
												NC_041803.1	rna-XM_008341067.3	==	Pg_chr05	Pg_chr05_11720T
												NC_041804.1	rna-XM_008341474.3	==	Pg_chr02	Pg_chr02_48740T
												NC_041805.1	rna-XM_017324302.2	==	Pg_chr01	Pg_chr01_24060T
