# Supplementary material for: Genome-wide identification of bZIP transcription factors and their expression analysis in Platycodon grandiflorus under abiotic stress
Source: Front Plant Sci. 2024 May 28;15:1403220. doi: 10.3389/fpls.2024.1403220 (PMC11165138; doi:10.3389/fpls.2024.1403220)
Supplement: Supplementary file 5 [file Table_5.xlsx]

## Sheet: Sheet1
Heatmap of the expression pattern of PgbZIP gene in 8 tissues of P. grandifloru
gene ID	Rename	Leaf	Petal	Pistil	Root	Seed	Sepal	Stamen	Stem
Pg_chr01_03120	PgbZIP1	2.396	0.711	0.429	0.963	0.728	0.498	39.231	0.579
Pg_chr01_13470	PgbZIP2	4.839	32.857	20.124	11.842	6.839	9.596	0.746	7.997
Pg_chr01_24060	PgbZIP3	5.314	0	0.035	0.343	0	6.171	0	62.953
Pg_chr01_36170	PgbZIP4	29.435	24.868	20.48	16.071	8.72	23.745	5.114	22.343
Pg_chr02_21840	PgbZIP5	190.955	88.58	142.954	206.901	44.621	128.972	23.625	99.306
Pg_chr02_24710	PgbZIP6	7.419	6.983	1.851	13.689	0.724	3.867	5.81	9.286
Pg_chr02_26970	PgbZIP7	0.128	3.672	5.284	1.545	0.498	1.352	0.158	1.129
Pg_chr02_36690	PgbZIP8	3.944	8.684	11.623	43.961	11.616	11.45	2.006	16.657
Pg_chr02_45810	PgbZIP9	1.612	0.047	0.17	75.565	0.144	6.013	9.732	44.151
Pg_chr02_45820	PgbZIP10	0.913	0.193	0.804	4.828	0	4.048	1.576	20.4
Pg_chr02_48740	PgbZIP11	0.109	0.44	1.546	3.724	1.015	1.59	0.536	0.366
Pg_chr03_05930	PgbZIP12	0.203	0.086	0.039	0.37	21.041	0.302	0.125	0.753
Pg_chr03_13860	PgbZIP13	10.153	16.105	23.065	18.052	49.909	16.231	35.747	16.042
Pg_chr03_14590	PgbZIP14	16.712	14.282	20.717	26.474	25.127	18.075	16.975	19.277
Pg_chr03_15470	PgbZIP15	21.435	7.274	5.51	24.152	7.899	8.444	3.531	29.149
Pg_chr03_18510	PgbZIP16	0	0.019	0.017	0.034	0	0.037	0	0
Pg_chr03_23670	PgbZIP17	0	0	0	0.016	0.354	0.205	0	0
Pg_chr03_24210	PgbZIP18	0.709	1.41	0.83	2.316	3.628	1.188	0.823	1.053
Pg_chr03_29870	PgbZIP19	27.938	31.128	27.746	27.316	13.95	22.847	6.625	50.084
Pg_chr03_41000	PgbZIP20	0.266	25.074	6.714	1.271	1.112	1.441	0.146	0.075
Pg_chr04_13120	PgbZIP21	20.154	29.211	35.079	25.034	40.77	32.845	28.12	29.827
Pg_chr04_14910	PgbZIP22	4.144	0.867	0.365	0.471	0.667	0.358	0.543	1.697
Pg_chr04_14920	PgbZIP23	13.512	10.527	3.471	23.316	8.81	8.403	1.777	32.495
Pg_chr04_16600	PgbZIP24	11.133	9.106	10.06	9.636	10.39	8.12	97.812	11.133
Pg_chr04_17120	PgbZIP25	23.971	25.878	14.049	35.522	40.162	18.55	15.297	71.898
Pg_chr04_24190	PgbZIP26	0.376	0.205	0.49	0.017	0.029	0.234	1463.12	0.056
Pg_chr04_44620	PgbZIP27	21.762	0.513	4.281	49.026	6.099	14.819	0.709	8.31
Pg_chr04_47570	PgbZIP28	27.951	36.616	44.979	57.197	55.623	39.076	60.165	35.933
Pg_chr05_11720	PgbZIP29	15.737	10.996	13.771	8.957	47.075	10.232	27.855	11.742
Pg_chr05_24330	PgbZIP30	28.587	17.679	18.47	19.283	24.866	20.466	52.384	25.549
Pg_chr05_25760	PgbZIP31	0	14.393	22.266	2.678	0.252	5.454	2.528	0
Pg_chr05_35190	PgbZIP32	20.46	23.389	24.78	38.853	15.519	15.579	4.638	20.372
Pg_chr06_01830	PgbZIP33	94.374	68.24	76.085	123.623	57.14	64.137	199.802	46.248
Pg_chr06_14230	PgbZIP34	0.48	0.385	1.12	1.939	3.27	0.976	594.231	0.484
Pg_chr06_15840	PgbZIP35	0	0	0	0	2.417	0	0	0
Pg_chr06_27120	PgbZIP36	0.274	0.608	0.669	1.657	8.523	1.325	1.945	10.213
Pg_chr06_27140	PgbZIP37	0	0	0.037	0	196.671	0	0	0
Pg_chr07_00550	PgbZIP38	6.851	2.397	3.992	14.85	1.958	3.14	2.963	16.673
Pg_chr07_19130	PgbZIP39	19.366	12.012	14.684	1.62	0	40.585	11.79	10.367
Pg_chr07_26570	PgbZIP40	35.926	114.481	60.037	1.485	7.832	47.26	7.523	25.271
Pg_chr07_29960	PgbZIP41	37.147	126.335	68.841	1.741	7.862	56.654	9.028	31.451
Pg_chr08_00320	PgbZIP42	50.14	41.857	38.256	31.491	33.774	43.137	20.351	41.917
Pg_chr08_24200	PgbZIP43	0	0.18	0	0	128.089	0	0.059	0
Pg_chr08_31010	PgbZIP44	10.03	22.809	12.194	13.801	28.396	9.867	7.955	24.635
Pg_chr09_28610	PgbZIP45	13.206	18.739	20.342	23.33	30.721	17.804	49.187	14.742
Pg_conig00116_02430	PgbZIP46	0.43	0.51	0.32	0.83	1.27	0.45	0	0.99
Pg_conig01856_00120	PgbZIP47	0.04	0.64	1	4.27	1.02	2.1	2.67	4.42
