# Supplementary material for: Genome-wide identification of bZIP transcription factors and their expression analysis in Platycodon grandiflorus under abiotic stress
Source: Front Plant Sci. 2024 May 28;15:1403220. doi: 10.3389/fpls.2024.1403220 (PMC11165138; doi:10.3389/fpls.2024.1403220)
Supplement: Supplementary file 6 [file Table_6.xlsx]

## Sheet: Sheet1
The qPCR primers sequences used in this study.
PgbZIP5-F	AGAGAATGCAATCCAACCGC
PgbZIP5-R	GTTGTGATGCTCGTGGTTGT
PgbZIP13-F	CGATCCACTCCCTATCCCAC
PgbZIP13-R	AGGGAGGTAGAGATCGTCGA
PgbZIP14-F	TTGATTATGTGCAGCAGGGC
PgbZIP14-R	GCCACACCTCATCAACAGTC
PgbZIP21-F	AAGGAGGCGAAAGATGGGAA
PgbZIP21-R	GGACTTGATGCCATGAACCC
PgbZIP25-F	GGGGATTCGATGGGGATGAT
PgbZIP25-R	CTTGGAACGTGCTGCAGATT
PgbZIP28-F	GCGCCTTTCCTTGCAGAATA
PgbZIP28-R	CAGGAACCAAAGCAGGGAAC
PgbZIP30-F	AGTGAAGATGGCGGAAGAGG
PgbZIP30-R	GTCGGTTGATGTGTCGGAAG
PgbZIP33-F	GCCAGATCAACCAGCTGAAG
PgbZIP33-R	AGTTCTGCAATCTGGGCTCT
PgbZIP42-F	TTACTGCCTTCATCCTGGGG
PgbZIP42-R	CTCCACAACCTTGAAGCTCG
PgbZIP45-F	GGATGGGTCGACTAGCATCA
PgbZIP45-R	TGCACGCTTTGGATCAACAA
GAPDH-F	CAGGGAGGCTTTTAGTTCAGGT
GAPDH-R	ATCACATCTACACCCCTCCAGC
