# Supplementary material for: Genome-wide identification of bZIP transcription factors and their expression analysis in Platycodon grandiflorus under abiotic stress
Source: Front Plant Sci. 2024 May 28;15:1403220. doi: 10.3389/fpls.2024.1403220 (PMC11165138; doi:10.3389/fpls.2024.1403220)
Supplement: Supplementary file 7 [file Table_7.xlsx]

## Sheet: nodes
List of transcription factors co-expressed with PgbZIP genes
1	Pg_chr01_14460T	AP2	1	Pg_chr02_36690T	bZIP		Pg_chr09_28610T	bZIP	PgbZIP45	56
2	Pg_chr01_26980T	AP2	2	Pg_chr03_14590T	bZIP		Pg_chr05_24320T	bZIP	PgbZIP30	55
3	Pg_chr06_31180T	ARF	3	Pg_chr01_36170T	bZIP		Pg_chr03_13860T	bZIP	PgbZIP13	34
4	Pg_chr09_15100T	ARF	4	Pg_chr05_11720T	bZIP		Pg_chr05_35190T	bZIP	PgbZIP32	30
5	Pg_chr02_53110T	ARR-B	5	Pg_chr04_16600T	bZIP		Pg_chr01_13470T	bZIP	PgbZIP2	29
6	Pg_chr07_18650T	ARR-B	6	Pg_chr02_21840T	bZIP		Pg_chr04_47570T	bZIP	PgbZIP28	28
7	Pg_chr04_10600T	ARR-B	7	Pg_chr04_47570T	bZIP		Pg_chr04_16600T	bZIP	PgbZIP24	27
8	Pg_chr06_13730T	B3	8	Pg_chr07_19130T	bZIP		Pg_chr03_29870T	bZIP	PgbZIP19	25
9	Pg_chr03_30280T	B3	9	Pg_chr04_14920T	bZIP		Pg_chr08_00320T	bZIP	PgbZIP42	19
10	Pg_chr05_00990T	B3	10	Pg_chr05_35190T	bZIP		Pg_chr07_29960T	bZIP	PgbZIP40	18
11	Pg_chr05_35170T	BBR-BPC	11	Pg_chr08_00320T	bZIP		Pg_chr02_21840T	bZIP	PgbZIP5	17
12	Pg_chr02_31040T	BBR-BPC	12	Pg_chr09_28610T	bZIP		Pg_chr04_13120T	bZIP	PgbZIP21	17
13	Pg_chr02_21090T	BBR-BPC	13	Pg_chr08_31010T	bZIP		Pg_chr04_14920T	bZIP	PgbZIP23	16
14	Pg_chr02_23180T	BES1	14	Pg_chr05_24320T	bZIP		Pg_chr01_36170T	bZIP	PgbZIP4	12
15	Pg_chr01_35980T	BES1	15	Pg_chr04_13120T	bZIP		Pg_chr02_23110T	bZIP		8
16	Pg_contig01096_00060T	bHLH	16	Pg_chr07_29960T	bZIP		Pg_chr08_31480T	C3H		8
17	Pg_chr06_28500T	bHLH	17	Pg_chr03_29870T	bZIP		Pg_chr05_09390T	GATA		8
18	Pg_chr01_47950T	bHLH	18	Pg_chr03_13860T	bZIP		Pg_contig26001_00320T	NF-YA		7
19	Pg_chr05_26340T	bHLH	19	Pg_chr01_13470T	bZIP		Pg_chr06_07740T	bHLH		7
20	Pg_chr06_07740T	bHLH					Pg_chr01_14460T	AP2		7
21	Pg_chr01_46070T	bHLH					Pg_chr02_03150T	MYB_related		7
22	Pg_chr04_31860T	bHLH					Pg_chr05_11720T	bZIP		6
23	Pg_chr01_59290T	bHLH					Pg_chr07_20280T	C3H		6
24	Pg_chr06_07250T	bHLH					Pg_chr02_48140T	ERF		6
25	Pg_chr03_39080T	bHLH					Pg_chr03_30280T	B3		5
26	Pg_contig00116_02750T	bHLH					Pg_chr06_31060T	NF-YC		5
27	Pg_chr02_16640T	bHLH					Pg_chr04_04210T	TCP		5
28	Pg_chr02_11330T	bHLH					Pg_chr08_11270T	GRAS		5
29	Pg_chr01_20740T	bHLH					Pg_chr01_52520T	Trihelix		5
30	Pg_chr07_04170T	C2H2					Pg_chr03_14590T	bZIP		4
31	Pg_chr01_36220T	C2H2					Pg_chr06_28500T	bHLH		4
32	Pg_chr03_10030T	C2H2					Pg_chr08_06240T	MYB		4
33	Pg_chr05_31400T	C2H2					Pg_chr01_47950T	bHLH		4
34	Pg_chr02_42230T	C2H2					Pg_chr06_34330T	MYB_related		4
35	Pg_contig00116_00020T	C3H					Pg_chr02_48160T	ERF		4
36	Pg_chr07_20280T	C3H					Pg_chr06_13730T	B3		4
37	Pg_chr08_31480T	C3H					Pg_chr03_10030T	C2H2		4
38	Pg_chr03_33670T	C3H					Pg_chr02_05400T	MYB_related		4
39	Pg_chr04_11970T	C3H					Pg_chr03_33670T	C3H		4
40	Pg_contig26039_01240T	C3H					Pg_chr04_12380T	HSF		4
41	Pg_chr04_17720T	C3H					Pg_chr08_31010T	bZIP		4
42	Pg_chr08_16300T	C3H					Pg_chr04_46640T	WOX		4
43	Pg_chr06_16410T	C3H					Pg_chr05_31400T	C2H2		4
44	Pg_chr05_35200T	C3H					Pg_chr01_59290T	bHLH		4
45	Pg_chr06_35870T	C3H					Pg_chr09_04200T	G2-like		4
46	Pg_chr03_33670T	C3H					Pg_chr08_16380T	NF-YA		3
47	Pg_chr07_04020T	CAMTA					Pg_chr07_19130T	bZIP		3
48	Pg_chr02_45370T	CAMTA					Pg_contig00116_05020T	ERF		3
49	Pg_chr06_04020T	CO-like					Pg_contig00116_05400T	WRKY		3
50	Pg_chr05_35030T	DBB					Pg_chr09_14450T	G2-like		3
51	Pg_contig00429_00230T	DBB					Pg_chr06_26830T	NF-YB		3
52	Pg_chr01_56390T	Dof					Pg_contig00572_01490T	HB-PHD		3
53	Pg_chr06_13950T	ERF					Pg_contig00429_00230T	DBB		3
54	Pg_contig00116_05020T	ERF					Pg_chr02_31040T	BBR-BPC		3
55	Pg_chr02_48140T	ERF					Pg_chr05_35200T	C3H		3
56	Pg_chr02_48160T	ERF					Pg_chr08_33140T	MYB_related		3
57	Pg_chr05_28610T	ERF					Pg_chr01_39480T	WRKY		3
58	Pg_chr01_54740T	ERF					Pg_chr07_04170T	C2H2		2
59	Pg_chr09_04100T	ERF					Pg_chr02_23180T	BES1		2
60	Pg_chr01_11940T	ERF					Pg_chr02_36690T	bZIP		2
61	Pg_chr01_11920T	ERF					Pg_chr03_41930T	MYB		2
62	Pg_chr02_25040T	ERF					Pg_chr06_13950T	ERF		2
63	Pg_chr03_33680T	ERF					Pg_chr01_18080T	MYB_related		2
64	Pg_chr01_11970T	ERF					Pg_chr01_36220T	C2H2		2
65	Pg_chr05_28260T	G2-like					Pg_chr01_54880T	SBP		2
66	Pg_chr09_14450T	G2-like					Pg_chr02_21370T	MIKC_MADS		2
67	Pg_chr03_13940T	G2-like					Pg_chr02_43670T	Trihelix		2
68	Pg_chr09_04200T	G2-like					Pg_chr05_26340T	bHLH		2
69	Pg_chr02_31390T	G2-like					Pg_chr01_20200T	NAC		2
70	Pg_chr05_41490T	G2-like					Pg_chr02_53110T	ARR-B		2
71	Pg_chr05_09390T	GATA					Pg_chr04_37130T	Trihelix		2
72	Pg_chr01_32410T	GATA					Pg_chr06_04020T	CO-like		2
73	Pg_chr05_23530T	GeBP					Pg_chr05_28260T	G2-like		2
74	Pg_chr05_33870T	GeBP					Pg_chr01_46070T	bHLH		2
75	Pg_chr01_59180T	GeBP					Pg_contig26039_01240T	C3H		2
76	Pg_chr07_13610T	GRAS					Pg_chr07_04020T	CAMTA		2
77	Pg_chr01_36160T	GRAS					Pg_chr04_31330T	HD-ZIP		2
78	Pg_chr08_11270T	GRAS					Pg_chr09_04100T	ERF		2
79	Pg_chr04_06610T	GRAS					Pg_chr05_39080T	Trihelix		2
80	Pg_chr02_05340T	HB-other					Pg_chr05_36750T	HD-ZIP		2
81	Pg_chr06_22460T	HB-other					Pg_chr06_07250T	bHLH		2
82	Pg_contig00572_01490T	HB-PHD					Pg_chr02_05340T	HB-other		2
83	Pg_contig26039_01330T	HD-ZIP					Pg_chr01_11920T	ERF		2
84	Pg_chr04_31330T	HD-ZIP					Pg_chr02_25040T	ERF		2
85	Pg_chr05_36750T	HD-ZIP					Pg_chr05_23530T	GeBP		2
86	Pg_chr02_05280T	HD-ZIP					Pg_chr09_13510T	LSD		2
87	Pg_chr04_07910T	HD-ZIP					Pg_chr02_05280T	HD-ZIP		2
88	Pg_chr04_12380T	HSF					Pg_chr05_33870T	GeBP		2
89	Pg_chr09_03470T	HSF					Pg_chr09_15100T	ARF		2
90	Pg_chr09_13510T	LSD					Pg_chr04_07910T	HD-ZIP		2
91	Pg_chr02_21370T	MIKC_MADS					Pg_chr05_41490T	G2-like		2
92	Pg_chr01_23650T	MIKC_MADS					Pg_chr08_02870T	MYB		2
93	Pg_chr03_41930T	MYB					Pg_chr06_35870T	C3H		2
94	Pg_chr08_06240T	MYB					Pg_chr04_40200T	NF-X1		2
95	Pg_chr01_15040T	MYB					Pg_chr02_42230T	C2H2		2
96	Pg_chr08_09980T	MYB					Pg_chr01_32410T	GATA		2
97	Pg_chr06_17250T	MYB					Pg_chr03_39080T	bHLH		2
98	Pg_chr08_02870T	MYB					Pg_chr09_18380T	NF-YC		2
99	Pg_chr01_00580T	MYB					Pg_chr01_56390T	Dof		2
100	Pg_contig00116_02850T	MYB_related					Pg_chr03_33680T	ERF		2
101	Pg_chr01_18080T	MYB_related					Pg_chr04_47650T	SBP		2
102	Pg_chr06_34330T	MYB_related					Pg_chr08_10730T	NAC		2
103	Pg_chr01_06760T	MYB_related					Pg_chr08_10750T	NAC		2
104	Pg_chr05_06490T	MYB_related					Pg_chr09_03470T	HSF		2
105	Pg_chr02_05400T	MYB_related					Pg_chr04_10600T	ARR-B		2
106	Pg_chr02_03150T	MYB_related					Pg_chr05_07440T	NF-YB		2
107	Pg_chr08_33140T	MYB_related					Pg_contig01096_00060T	bHLH		1
108	Pg_chr02_22450T	MYB_related					Pg_chr07_13610T	GRAS		1
109	Pg_chr05_18840T	MYB_related					Pg_contig00116_02250T	TALE		1
110	Pg_chr01_30950T	MYB_related					Pg_contig00116_02850T	MYB_related		1
111	Pg_chr01_20200T	NAC					Pg_contig00116_00020T	C3H		1
112	Pg_chr08_20400T	NAC					Pg_chr01_06760T	MYB_related		1
113	Pg_chr04_15310T	NAC					Pg_chr01_36160T	GRAS		1
114	Pg_chr08_10730T	NAC					Pg_chr05_28610T	ERF		1
115	Pg_chr08_10750T	NAC					Pg_chr01_15040T	MYB		1
116	Pg_chr03_37480T	NAC					Pg_chr05_06490T	MYB_related		1
117	Pg_chr04_40200T	NF-X1					Pg_contig26039_01330T	HD-ZIP		1
118	Pg_chr08_16380T	NF-YA					Pg_chr06_31180T	ARF		1
119	Pg_contig26001_00320T	NF-YA					Pg_chr02_25290T	WRKY		1
120	Pg_chr06_26830T	NF-YB					Pg_chr01_54740T	ERF		1
121	Pg_chr03_35140T	NF-YB					Pg_chr04_11970T	C3H		1
122	Pg_chr02_20600T	NF-YB					Pg_chr04_04210T	Trihelix		1
123	Pg_chr05_07440T	NF-YB					Pg_chr08_09980T	MYB		1
124	Pg_chr06_31060T	NF-YC					Pg_chr03_13940T	G2-like		1
125	Pg_chr09_18380T	NF-YC					Pg_chr04_17720T	C3H		1
126	Pg_chr05_07820T	S1Fa-like					Pg_chr04_31860T	bHLH		1
127	Pg_chr01_54880T	SBP					Pg_chr08_16300T	C3H		1
128	Pg_chr04_47650T	SBP					Pg_chr02_36900T	Trihelix		1
129	Pg_chr07_16410T	SBP					Pg_chr05_35030T	DBB		1
130	Pg_contig00116_02250T	TALE					Pg_chr08_20400T	NAC		1
131	Pg_chr04_04260T	TALE					Pg_chr05_35170T	BBR-BPC		1
132	Pg_chr09_08690T	TALE					Pg_chr01_11940T	ERF		1
133	Pg_chr03_42330T	TALE					Pg_chr04_04260T	TALE		1
134	Pg_chr04_04210T	TCP					Pg_chr06_17250T	MYB		1
135	Pg_chr02_43670T	Trihelix					Pg_chr06_16410T	C3H		1
136	Pg_chr04_37130T	Trihelix					Pg_chr01_23650T	MIKC_MADS		1
137	Pg_chr04_04210T	Trihelix					Pg_chr02_31390T	G2-like		1
138	Pg_chr02_36900T	Trihelix					Pg_chr09_08690T	TALE		1
139	Pg_chr05_39080T	Trihelix					Pg_chr04_15310T	NAC		1
140	Pg_chr01_52520T	Trihelix					Pg_chr03_35140T	NF-YB		1
141	Pg_chr03_25390T	Trihelix					Pg_chr02_22450T	MYB_related		1
142	Pg_chr04_16880T	Trihelix					Pg_chr04_17120T	bZIP		1
143	Pg_chr04_46640T	WOX					Pg_chr03_33670T	C3H		1
144	Pg_chr02_25290T	WRKY					Pg_chr03_42330T	TALE		1
145	Pg_contig00116_05400T	WRKY					Pg_chr04_06610T	GRAS		1
146	Pg_chr01_39480T	WRKY					Pg_chr01_11970T	ERF		1
147	Pg_chr05_00850T	WRKY					Pg_chr01_59180T	GeBP		1
148	Pg_chr08_13650T	WRKY					Pg_chr05_07820T	S1Fa-like		1
149	Pg_chr01_21010T	ZF-HD					Pg_chr02_21090T	BBR-BPC		1
							Pg_chr03_25390T	Trihelix		1
							Pg_chr07_18650T	ARR-B		1
							Pg_chr02_20600T	NF-YB		1
							Pg_chr05_00990T	B3		1
							Pg_chr05_00850T	WRKY		1
							Pg_chr01_35980T	BES1		1
							Pg_chr01_21010T	ZF-HD		1
							Pg_chr02_45370T	CAMTA		1
							Pg_chr01_00580T	MYB		1
							Pg_chr05_18840T	MYB_related		1
							Pg_chr06_22460T	HB-other		1
							Pg_chr03_37480T	NAC		1
							Pg_chr07_16410T	SBP		1
							Pg_chr01_26980T	AP2		1
							Pg_chr01_30950T	MYB_related		1
							Pg_contig00116_02750T	bHLH		1
							Pg_chr08_13650T	WRKY		1
							Pg_chr02_16640T	bHLH		1
							Pg_chr02_11330T	bHLH		1
							Pg_chr04_16880T	Trihelix		1
							Pg_chr01_20740T	bHLH		1

## Sheet: network pairs
List of transcription factors co-expressed with PgbZIP genes
	Gene_id	Gene_id	PCC			Gene_id	Gene_id	PCC
1	Pg_chr06_34330T	Pg_chr04_16600T	0.999524		1	Pg_chr03_13940T	Pg_chr05_24320T	-0.707537
2	Pg_chr03_10030T	Pg_chr04_16600T	0.999191		2	Pg_chr02_03150T	Pg_chr05_35190T	-0.708163
3	Pg_chr02_48160T	Pg_chr04_16600T	0.997309		3	Pg_chr05_18840T	Pg_chr01_13470T	-0.708347
4	Pg_chr05_31400T	Pg_chr05_24320T	0.985512		4	Pg_chr04_04210T	Pg_chr04_13120T	-0.709568
5	Pg_chr02_03150T	Pg_chr09_28610T	0.984691		5	Pg_chr05_31400T	Pg_chr05_35190T	-0.710526
6	Pg_chr01_59290T	Pg_chr05_24320T	0.983607		6	Pg_chr03_29870T	Pg_chr03_13860T	-0.710582
7	Pg_chr02_20600T	Pg_chr05_24320T	0.980753		7	Pg_chr07_20280T	Pg_chr05_35190T	-0.711772
8	Pg_chr07_20280T	Pg_chr04_16600T	0.980285		8	Pg_chr02_21840T	Pg_chr04_13120T	-0.714039
9	Pg_chr06_31060T	Pg_chr04_16600T	0.97529		9	Pg_chr04_04210T	Pg_chr03_13860T	-0.715084
10	Pg_chr01_52520T	Pg_chr09_28610T	0.975089		10	Pg_chr07_20280T	Pg_chr01_36170T	-0.715212
11	Pg_chr02_05400T	Pg_chr05_24320T	0.974998		11	Pg_chr08_11270T	Pg_chr04_47570T	-0.720587
12	Pg_chr04_16600T	Pg_chr05_24320T	0.96999		12	Pg_chr04_04210T	Pg_chr05_24320T	-0.722898
13	Pg_chr05_09390T	Pg_chr09_28610T	0.966751		13	Pg_chr04_31860T	Pg_chr04_14920T	-0.725222
14	Pg_chr02_25040T	Pg_chr05_24320T	0.96655		14	Pg_chr02_48140T	Pg_chr03_13860T	-0.726254
15	Pg_chr03_10030T	Pg_chr05_24320T	0.966014		15	Pg_chr05_09390T	Pg_chr08_00320T	-0.726811
16	Pg_chr06_34330T	Pg_chr05_24320T	0.965146		16	Pg_chr02_48140T	Pg_chr04_47570T	-0.728962
17	Pg_chr02_48160T	Pg_chr05_24320T	0.965144		17	Pg_chr05_11720T	Pg_chr02_21840T	-0.729805
18	Pg_chr09_13510T	Pg_chr05_24320T	0.964088		18	Pg_contig00429_00230T	Pg_chr09_28610T	-0.731107
19	Pg_chr02_05400T	Pg_chr04_16600T	0.963969		19	Pg_chr02_36900T	Pg_chr05_24320T	-0.731593
20	Pg_chr04_40200T	Pg_chr05_24320T	0.958415		20	Pg_chr06_26830T	Pg_chr01_13470T	-0.732202
21	Pg_chr03_39080T	Pg_chr05_24320T	0.957268		21	Pg_chr01_14460T	Pg_chr05_24320T	-0.732333
22	Pg_contig00116_05020T	Pg_chr04_16600T	0.955214		22	Pg_chr04_04210T	Pg_chr04_47570T	-0.732439
23	Pg_chr06_07250T	Pg_chr04_14920T	0.949969		23	Pg_chr02_03150T	Pg_chr03_29870T	-0.733862
24	Pg_chr02_42230T	Pg_chr05_24320T	0.948141		24	Pg_chr04_46640T	Pg_chr04_16600T	-0.733949
25	Pg_chr01_30950T	Pg_chr01_13470T	0.947991		25	Pg_chr02_21840T	Pg_chr09_28610T	-0.734096
26	Pg_chr06_31060T	Pg_chr05_24320T	0.947638		26	Pg_chr09_14450T	Pg_chr03_13860T	-0.734631
27	Pg_chr05_11720T	Pg_chr03_13860T	0.946434		27	Pg_chr05_09390T	Pg_chr02_21840T	-0.735452
28	Pg_chr03_33680T	Pg_chr05_24320T	0.94619		28	Pg_chr09_04200T	Pg_chr09_28610T	-0.735808
29	Pg_chr01_35980T	Pg_chr05_24320T	0.946149		29	Pg_chr03_14590T	Pg_chr01_36170T	-0.73627
30	Pg_chr07_20280T	Pg_chr09_28610T	0.944978		30	Pg_chr01_00580T	Pg_chr01_13470T	-0.736556
31	Pg_chr06_31060T	Pg_chr09_28610T	0.943745		31	Pg_chr02_43670T	Pg_chr07_19130T	-0.737497
32	Pg_chr02_53110T	Pg_chr01_13470T	0.939005		32	Pg_chr04_17720T	Pg_chr07_19130T	-0.738205
33	Pg_chr07_20280T	Pg_chr05_24320T	0.936011		33	Pg_chr08_31480T	Pg_chr08_00320T	-0.738411
34	Pg_contig00116_05020T	Pg_chr05_24320T	0.934041		34	Pg_chr03_14590T	Pg_chr07_29960T	-0.738618
35	Pg_chr06_16410T	Pg_chr05_35190T	0.933766		35	Pg_chr01_15040T	Pg_chr04_14920T	-0.738703
36	Pg_chr05_09390T	Pg_chr04_16600T	0.933633		36	Pg_chr01_36170T	Pg_chr05_11720T	-0.738732
37	Pg_chr09_04100T	Pg_chr07_29960T	0.9292		37	Pg_contig00429_00230T	Pg_chr03_13860T	-0.740792
38	Pg_chr02_16640T	Pg_chr01_13470T	0.926236		38	Pg_chr06_35870T	Pg_chr09_28610T	-0.741019
39	Pg_chr01_20740T	Pg_chr01_13470T	0.925044		39	Pg_chr05_35190T	Pg_chr05_24320T	-0.745268
40	Pg_chr01_56390T	Pg_chr07_29960T	0.924483		40	Pg_chr05_09390T	Pg_chr05_35190T	-0.745561
41	Pg_chr08_31480T	Pg_chr03_13860T	0.923869		41	Pg_chr06_13730T	Pg_chr05_35190T	-0.746327
42	Pg_chr04_16880T	Pg_chr01_13470T	0.921821		42	Pg_chr01_52520T	Pg_chr08_00320T	-0.746852
43	Pg_chr05_33870T	Pg_chr08_00320T	0.919789		43	Pg_chr03_30280T	Pg_chr04_47570T	-0.746894
44	Pg_chr04_47570T	Pg_chr09_28610T	0.919489		44	Pg_chr08_33140T	Pg_chr08_00320T	-0.747847
45	Pg_chr01_36170T	Pg_chr08_00320T	0.919082		45	Pg_contig26001_00320T	Pg_chr05_35190T	-0.747894
46	Pg_chr04_04260T	Pg_chr08_31010T	0.915909		46	Pg_chr04_47570T	Pg_chr03_29870T	-0.750339
47	Pg_chr01_56390T	Pg_chr01_13470T	0.91568		47	Pg_chr04_11970T	Pg_chr04_16600T	-0.752484
48	Pg_chr01_26980T	Pg_chr01_13470T	0.913661		48	Pg_chr02_48140T	Pg_chr09_28610T	-0.752809
49	Pg_chr04_47650T	Pg_chr01_13470T	0.912254		49	Pg_chr09_18380T	Pg_chr09_28610T	-0.753999
50	Pg_chr04_40200T	Pg_chr09_28610T	0.909142		50	Pg_chr08_31480T	Pg_chr03_29870T	-0.754685
51	Pg_chr05_00990T	Pg_chr04_13120T	0.907446		51	Pg_chr01_59290T	Pg_chr05_35190T	-0.755712
52	Pg_chr05_09390T	Pg_chr05_24320T	0.905534		52	Pg_chr06_31060T	Pg_chr05_35190T	-0.757708
53	Pg_chr09_04100T	Pg_chr01_13470T	0.902135		53	Pg_chr08_16380T	Pg_chr07_29960T	-0.758197
54	Pg_chr05_28260T	Pg_chr05_24320T	0.90202		54	Pg_chr02_22450T	Pg_chr04_13120T	-0.761105
55	Pg_chr05_26340T	Pg_chr05_24320T	0.901768		55	Pg_chr05_06490T	Pg_chr04_13120T	-0.761189
56	Pg_chr04_31330T	Pg_chr04_14920T	0.901128		56	Pg_chr05_07440T	Pg_chr03_29870T	-0.761967
57	Pg_chr03_39080T	Pg_chr09_28610T	0.900139		57	Pg_chr03_30280T	Pg_chr05_24320T	-0.763566
58	Pg_chr03_25390T	Pg_chr05_24320T	0.897794		58	Pg_chr03_41930T	Pg_chr04_16600T	-0.764287
59	Pg_chr08_33140T	Pg_chr05_24320T	0.894974		59	Pg_chr01_39480T	Pg_chr05_24320T	-0.764328
60	Pg_chr03_10030T	Pg_chr09_28610T	0.89313		60	Pg_chr08_11270T	Pg_chr03_13860T	-0.764573
61	Pg_chr03_33670T	Pg_chr04_16600T	0.891149		61	Pg_chr08_31480T	Pg_chr02_21840T	-0.76546
62	Pg_chr06_34330T	Pg_chr09_28610T	0.890871		62	Pg_chr01_47950T	Pg_chr09_28610T	-0.767094
63	Pg_chr01_59290T	Pg_chr09_28610T	0.889498		63	Pg_chr04_07910T	Pg_chr03_13860T	-0.768004
64	Pg_chr02_03150T	Pg_chr04_47570T	0.889157		64	Pg_chr06_04020T	Pg_chr04_13120T	-0.768512
65	Pg_chr07_29960T	Pg_chr01_13470T	0.884526		65	Pg_chr05_23530T	Pg_chr04_14920T	-0.76983
66	Pg_chr01_39480T	Pg_chr03_29870T	0.883089		66	Pg_chr05_41490T	Pg_chr03_13860T	-0.770153
67	Pg_chr06_13730T	Pg_chr04_16600T	0.881228		67	Pg_chr09_08690T	Pg_chr04_13120T	-0.771149
68	Pg_chr08_11270T	Pg_chr03_29870T	0.879298		68	Pg_contig00116_05400T	Pg_chr05_24320T	-0.771474
69	Pg_chr04_16600T	Pg_chr09_28610T	0.879176		69	Pg_chr06_04020T	Pg_chr03_13860T	-0.771518
70	Pg_chr02_05280T	Pg_chr04_14920T	0.877358		70	Pg_chr05_39080T	Pg_chr09_28610T	-0.773438
71	Pg_chr07_18650T	Pg_chr03_29870T	0.875753		71	Pg_chr06_07740T	Pg_chr04_16600T	-0.774857
72	Pg_chr08_10750T	Pg_chr07_29960T	0.874438		72	Pg_contig00116_05400T	Pg_chr04_16600T	-0.778606
73	Pg_chr08_31480T	Pg_chr09_28610T	0.873489		73	Pg_chr02_03150T	Pg_chr08_00320T	-0.778917
74	Pg_chr08_10730T	Pg_chr05_24320T	0.87216		74	Pg_chr03_41930T	Pg_chr05_24320T	-0.779613
75	Pg_chr09_13510T	Pg_chr09_28610T	0.871626		75	Pg_chr01_52520T	Pg_chr03_29870T	-0.782662
76	Pg_contig26001_00320T	Pg_chr09_28610T	0.871502		76	Pg_chr02_21840T	Pg_chr03_13860T	-0.78996
77	Pg_chr09_03470T	Pg_chr05_24320T	0.871271		77	Pg_chr07_04020T	Pg_chr05_24320T	-0.791642
78	Pg_chr09_04200T	Pg_chr07_29960T	0.86596		78	Pg_chr04_46640T	Pg_chr03_13860T	-0.792398
79	Pg_contig26039_01330T	Pg_chr05_35190T	0.865552		79	Pg_chr01_11970T	Pg_chr03_13860T	-0.792871
80	Pg_contig00572_01490T	Pg_chr05_24320T	0.864824		80	Pg_chr06_35870T	Pg_chr05_24320T	-0.792935
81	Pg_chr03_33680T	Pg_chr09_28610T	0.863842		81	Pg_chr08_16380T	Pg_chr08_00320T	-0.794159
82	Pg_chr08_09980T	Pg_chr08_31010T	0.863546		82	Pg_chr04_12380T	Pg_chr02_21840T	-0.798217
83	Pg_chr02_05400T	Pg_chr09_28610T	0.861926		83	Pg_chr09_28610T	Pg_chr03_29870T	-0.799218
84	Pg_chr02_03150T	Pg_chr05_24320T	0.861284		84	Pg_chr01_47950T	Pg_chr04_16600T	-0.800429
85	Pg_chr02_48160T	Pg_chr09_28610T	0.860273		85	Pg_chr02_31040T	Pg_chr09_28610T	-0.800497
86	Pg_chr06_26830T	Pg_chr05_24320T	0.858885		86	Pg_chr01_59180T	Pg_chr05_24320T	-0.800753
87	Pg_chr05_31400T	Pg_chr09_28610T	0.858631		87	Pg_chr04_10600T	Pg_chr03_13860T	-0.801567
88	Pg_chr02_21370T	Pg_chr01_13470T	0.855392		88	Pg_contig26001_00320T	Pg_chr02_21840T	-0.801815
89	Pg_chr01_18080T	Pg_chr05_24320T	0.85325		89	Pg_chr06_28500T	Pg_chr09_28610T	-0.802326
90	Pg_chr02_25290T	Pg_chr05_35190T	0.849603		90	Pg_chr08_00320T	Pg_chr09_28610T	-0.80701
91	Pg_chr07_16410T	Pg_chr01_13470T	0.849341		91	Pg_chr01_14460T	Pg_chr03_13860T	-0.807631
92	Pg_chr08_02870T	Pg_chr07_29960T	0.849111		92	Pg_contig00572_01490T	Pg_chr08_00320T	-0.811398
93	Pg_chr01_52520T	Pg_chr03_13860T	0.848416		93	Pg_chr08_11270T	Pg_chr09_28610T	-0.812941
94	Pg_chr08_31480T	Pg_chr04_47570T	0.845508		94	Pg_chr08_06240T	Pg_chr09_28610T	-0.815954
95	Pg_contig26001_00320T	Pg_chr03_13860T	0.841921		95	Pg_contig26039_01240T	Pg_chr03_29870T	-0.816104
96	Pg_chr08_13650T	Pg_chr01_13470T	0.841036		96	Pg_chr06_28500T	Pg_chr04_47570T	-0.818501
97	Pg_chr05_09390T	Pg_chr04_47570T	0.839914		97	Pg_chr02_05340T	Pg_chr04_13120T	-0.819539
98	Pg_chr04_12380T	Pg_chr03_13860T	0.83974		98	Pg_chr05_00850T	Pg_chr04_13120T	-0.821914
99	Pg_chr06_22460T	Pg_chr01_13470T	0.839249		99	Pg_chr01_20200T	Pg_chr04_13120T	-0.822624
100	Pg_chr05_07440T	Pg_chr03_13860T	0.83888		100	Pg_chr02_21090T	Pg_chr05_24320T	-0.826948
101	Pg_chr01_11940T	Pg_chr05_35190T	0.836968		101	Pg_chr04_12380T	Pg_chr05_35190T	-0.827708
102	Pg_chr05_28260T	Pg_chr04_16600T	0.835994		102	Pg_chr01_39480T	Pg_chr09_28610T	-0.830072
103	Pg_chr08_10750T	Pg_chr01_13470T	0.835612		103	Pg_chr02_31390T	Pg_chr04_13120T	-0.830284
104	Pg_chr01_14460T	Pg_chr03_29870T	0.834646		104	Pg_chr06_07740T	Pg_chr04_47570T	-0.830943
105	Pg_contig00572_01490T	Pg_chr09_28610T	0.834499		105	Pg_chr04_06610T	Pg_chr04_13120T	-0.832812
106	Pg_chr06_13730T	Pg_chr05_24320T	0.832164		106	Pg_chr01_14460T	Pg_chr04_47570T	-0.845546
107	Pg_chr02_23180T	Pg_chr03_14590T	0.831167		107	Pg_chr03_30280T	Pg_chr09_28610T	-0.84801
108	Pg_chr05_35170T	Pg_chr05_35190T	0.827354		108	Pg_chr01_47950T	Pg_chr05_24320T	-0.848674
109	Pg_chr06_07740T	Pg_chr02_21840T	0.826863		109	Pg_chr03_30280T	Pg_chr04_16600T	-0.859415
110	Pg_chr06_31180T	Pg_chr05_35190T	0.826303		110	Pg_chr08_16300T	Pg_chr05_24320T	-0.865108
111	Pg_chr07_04170T	Pg_chr01_13470T	0.824447		111	Pg_chr06_07740T	Pg_chr03_13860T	-0.867455
112	Pg_chr06_31060T	Pg_chr04_47570T	0.823055		112	Pg_chr02_05340T	Pg_chr03_13860T	-0.870681
113	Pg_chr05_26340T	Pg_chr04_16600T	0.821006		113	Pg_chr04_46640T	Pg_chr09_28610T	-0.872934
114	Pg_chr09_28610T	Pg_chr03_13860T	0.820263		114	Pg_chr01_36170T	Pg_chr03_13860T	-0.876212
115	Pg_contig00116_02750T	Pg_chr01_13470T	0.819773		115	Pg_chr05_41490T	Pg_chr09_28610T	-0.877491
116	Pg_chr01_32410T	Pg_chr04_13120T	0.818025		116	Pg_chr05_33870T	Pg_chr09_28610T	-0.88023
117	Pg_chr04_47650T	Pg_chr07_29960T	0.81785		117	Pg_chr01_36170T	Pg_chr09_28610T	-0.889943
118	Pg_chr02_21370T	Pg_chr07_29960T	0.81756		118	Pg_chr01_14460T	Pg_chr09_28610T	-0.894918
119	Pg_chr09_14450T	Pg_chr05_35190T	0.817296		119	Pg_chr05_35200T	Pg_chr09_28610T	-0.905838
120	Pg_chr02_48140T	Pg_chr04_14920T	0.816288		120	Pg_chr08_31480T	Pg_chr01_36170T	-0.908715
121	Pg_chr08_31480T	Pg_chr05_11720T	0.815933		121	Pg_chr05_35200T	Pg_chr03_13860T	-0.911825
122	Pg_chr01_18080T	Pg_chr04_16600T	0.815492		122	Pg_chr04_37130T	Pg_chr05_24320T	-0.914085
123	Pg_contig26039_01240T	Pg_chr03_13860T	0.812087		123	Pg_chr04_37130T	Pg_chr04_16600T	-0.926473
124	Pg_chr07_20280T	Pg_chr04_47570T	0.811185		124	Pg_chr08_06240T	Pg_chr04_16600T	-0.927311
125	Pg_chr01_47950T	Pg_chr05_35190T	0.810532		125	Pg_chr08_06240T	Pg_chr05_24320T	-0.935845
126	Pg_chr02_48140T	Pg_chr03_29870T	0.81009		126	Pg_chr06_07740T	Pg_chr09_28610T	-0.949772
127	Pg_chr09_28610T	Pg_chr05_24320T	0.808573		127	Pg_chr01_36170T	Pg_chr04_47570T	-0.949896
128	Pg_chr01_36220T	Pg_chr03_29870T	0.806492		128	Pg_chr04_47570T	Pg_chr08_00320T	-0.962139
129	Pg_chr01_46070T	Pg_chr07_29960T	0.806389		129	Pg_chr05_39080T	Pg_chr05_24320T	-0.963571
130	Pg_chr02_31040T	Pg_chr04_14920T	0.805945
131	Pg_chr02_03150T	Pg_chr03_13860T	0.802516
132	Pg_chr06_07740T	Pg_chr03_29870T	0.801021
133	Pg_chr05_36750T	Pg_chr03_29870T	0.799778
134	Pg_chr03_35140T	Pg_chr07_29960T	0.79965
135	Pg_chr02_42230T	Pg_chr09_28610T	0.799563
136	Pg_chr05_28610T	Pg_chr05_35190T	0.798313
137	Pg_chr08_33140T	Pg_chr09_28610T	0.798272
138	Pg_chr01_11920T	Pg_chr07_29960T	0.795415
139	Pg_chr08_06240T	Pg_chr05_35190T	0.793211
140	Pg_chr02_53110T	Pg_chr07_29960T	0.791386
141	Pg_chr04_14920T	Pg_chr03_29870T	0.787092
142	Pg_chr09_18380T	Pg_chr03_29870T	0.785421
143	Pg_chr05_07820T	Pg_chr02_21840T	0.785387
144	Pg_chr09_04200T	Pg_chr08_00320T	0.784474
145	Pg_chr02_36690T	Pg_chr05_35190T	0.783538
146	Pg_chr03_10030T	Pg_chr04_47570T	0.783059
147	Pg_chr01_20200T	Pg_chr02_21840T	0.781746
148	Pg_chr03_33670T	Pg_chr09_28610T	0.78161
149	Pg_chr08_11270T	Pg_chr04_14920T	0.781434
150	Pg_chr01_21010T	Pg_chr01_13470T	0.781173
151	Pg_chr06_34330T	Pg_chr04_47570T	0.779665
152	Pg_chr04_46640T	Pg_chr02_21840T	0.779487
153	Pg_chr06_17250T	Pg_chr05_24320T	0.778132
154	Pg_chr03_33670T	Pg_chr05_24320T	0.777648
155	Pg_chr03_37480T	Pg_chr01_13470T	0.775761
156	Pg_chr05_35030T	Pg_chr05_24320T	0.775127
157	Pg_chr03_33670T	Pg_chr04_47570T	0.772681
158	Pg_chr08_02870T	Pg_chr01_13470T	0.772661
159	Pg_chr01_32410T	Pg_chr03_13860T	0.771875
160	Pg_contig26001_00320T	Pg_chr05_24320T	0.768573
161	Pg_chr01_23650T	Pg_chr04_13120T	0.766808
162	Pg_contig00116_00020T	Pg_chr03_14590T	0.765309
163	Pg_contig01096_00060T	Pg_chr04_14920T	0.764908
164	Pg_chr09_15100T	Pg_chr01_13470T	0.764147
165	Pg_chr02_25040T	Pg_chr09_28610T	0.764073
166	Pg_chr09_14450T	Pg_chr04_14920T	0.763154
167	Pg_chr04_16600T	Pg_chr04_47570T	0.76273
168	Pg_chr02_11330T	Pg_chr01_13470T	0.760626
169	Pg_contig00116_02850T	Pg_chr07_19130T	0.7603
170	Pg_chr06_07740T	Pg_chr05_35190T	0.759071
171	Pg_chr05_07820T	Pg_chr05_35190T	0.757451
172	Pg_chr02_05280T	Pg_chr03_29870T	0.756929
173	Pg_chr08_20400T	Pg_chr08_00320T	0.754495
174	Pg_contig00429_00230T	Pg_chr08_00320T	0.753058
175	Pg_chr08_10730T	Pg_chr03_13860T	0.752889
176	Pg_chr05_35200T	Pg_chr08_00320T	0.752688
177	Pg_chr05_09390T	Pg_chr03_13860T	0.752002
178	Pg_chr03_30280T	Pg_chr02_21840T	0.751698
179	Pg_chr09_04200T	Pg_chr01_13470T	0.7501
180	Pg_chr06_28500T	Pg_chr08_00320T	0.750049
181	Pg_chr02_31040T	Pg_chr03_29870T	0.74823
182	Pg_contig26001_00320T	Pg_chr04_16600T	0.745266
183	Pg_chr04_13120T	Pg_chr03_13860T	0.743594
184	Pg_chr02_48160T	Pg_chr04_47570T	0.743007
185	Pg_chr05_11720T	Pg_chr09_28610T	0.74299
186	Pg_chr04_04210T	Pg_chr08_00320T	0.742504
187	Pg_chr06_07250T	Pg_chr03_29870T	0.74186
188	Pg_chr09_15100T	Pg_chr07_29960T	0.741841
189	Pg_chr07_04020T	Pg_chr05_35190T	0.741806
190	Pg_chr02_21840T	Pg_chr05_35190T	0.740878
191	Pg_chr04_12380T	Pg_chr09_28610T	0.740829
192	Pg_chr09_03470T	Pg_chr03_13860T	0.739935
193	Pg_chr01_46070T	Pg_chr01_13470T	0.738797
194	Pg_chr01_36220T	Pg_chr04_14920T	0.738636
195	Pg_contig26001_00320T	Pg_chr04_47570T	0.734633
196	Pg_chr01_59290T	Pg_chr04_47570T	0.734097
197	Pg_chr01_06760T	Pg_chr04_14920T	0.732506
198	Pg_chr06_13730T	Pg_chr09_28610T	0.732202
199	Pg_chr05_31400T	Pg_chr04_47570T	0.731567
200	Pg_chr06_28500T	Pg_chr01_36170T	0.731487
201	Pg_chr04_47570T	Pg_chr03_13860T	0.729518
202	Pg_chr02_23180T	Pg_chr02_36690T	0.729028
203	Pg_chr01_36170T	Pg_chr03_29870T	0.727835
204	Pg_contig00116_02250T	Pg_chr05_35190T	0.727695
205	Pg_chr05_36750T	Pg_chr04_14920T	0.726624
206	Pg_chr01_52520T	Pg_chr05_24320T	0.725657
207	Pg_chr05_23530T	Pg_chr09_28610T	0.725563
208	Pg_chr04_10600T	Pg_chr03_29870T	0.725073
209	Pg_chr05_07820T	Pg_chr04_13120T	0.724564
210	Pg_chr04_31330T	Pg_chr03_29870T	0.722703
211	Pg_chr04_15310T	Pg_chr05_24320T	0.721786
212	Pg_chr02_05400T	Pg_chr04_47570T	0.720842
213	Pg_contig00116_05020T	Pg_chr09_28610T	0.720411
214	Pg_chr04_07910T	Pg_chr07_29960T	0.718744
215	Pg_chr01_36160T	Pg_chr04_14920T	0.717067
216	Pg_chr07_13610T	Pg_chr01_13470T	0.716574
217	Pg_chr01_14460T	Pg_chr08_00320T	0.716059
218	Pg_chr06_13950T	Pg_chr05_35190T	0.715432
219	Pg_chr02_48140T	Pg_chr01_36170T	0.715395
220	Pg_chr02_45370T	Pg_chr01_13470T	0.715319
221	Pg_chr01_11920T	Pg_chr08_00320T	0.715273
222	Pg_chr06_26830T	Pg_chr09_28610T	0.713696
223	Pg_chr07_04170T	Pg_chr07_29960T	0.711638
224	Pg_chr04_04210T	Pg_chr02_21840T	0.710765
225	Pg_chr01_14460T	Pg_chr07_29960T	0.70891
226	Pg_contig00116_05400T	Pg_chr08_31010T	0.708317
227	Pg_chr08_16380T	Pg_chr04_47570T	0.705113
228	Pg_chr06_13950T	Pg_chr02_21840T	0.704323
229	Pg_chr03_42330T	Pg_chr03_29870T	0.703493
230	Pg_chr02_43670T	Pg_chr05_35190T	0.701893
231	Pg_chr03_33670T	Pg_chr04_13120T	0.7016
232	Pg_chr01_54740T	Pg_chr05_35190T	0.700019
