# Supplementary material for: Genome-wide identification of bZIP transcription factors and their expression analysis in Platycodon grandiflorus under abiotic stress
Source: Front Plant Sci. 2024 May 28;15:1403220. doi: 10.3389/fpls.2024.1403220 (PMC11165138; doi:10.3389/fpls.2024.1403220)
Supplement: Supplementary file 8 [file Table_8.xlsx]

## Sheet: go_class
GO and KEGG enrichment analysis
ID		Description	GeneRatio	BgRatio	pvalue	p.adjust	qvalue	geneID	Count
GO:0045893	biological_process	positive regulation of transcription, DNA-templated	14.2028	490/15055	6.26837e-15	2.36043e-12	1.75777e-12	Pg_chr09_15100T/Pg_chr06_28500T/Pg_chr06_07250T/Pg_chr07_04020T/Pg_chr02_45370T/Pg_chr01_11940T/Pg_chr01_11920T/Pg_chr02_25040T/Pg_chr05_28260T/Pg_chr09_14450T/Pg_chr09_04200T/Pg_chr02_31390T/Pg_chr05_41490T/Pg_chr05_09390T/Pg_chr01_32410T/Pg_contig00572_01490T/Pg_chr04_31330T/Pg_chr05_36750T/Pg_contig00116_02850T/Pg_chr08_33140T/Pg_chr08_20400T/Pg_chr04_15310T/Pg_chr08_10730T/Pg_chr08_10750T/Pg_…	25
GO:0010558	biological_process	negative regulation of macromolecule biosynthetic process	11.2001	399/15055	6.30781e-12	7.11521e-10	5.29856e-10	Pg_chr02_23180T/Pg_contig00116_00020T/Pg_chr04_11970T/Pg_contig00116_05020T/Pg_chr02_05340T/Pg_contig00572_01490T/Pg_chr04_31330T/Pg_chr05_36750T/Pg_chr04_07910T/Pg_chr08_09980T/Pg_chr01_00580T/Pg_chr08_33140T/Pg_chr08_10730T/Pg_chr04_40200T/Pg_chr08_16380T/Pg_contig26001_00320T/Pg_chr04_04260T/Pg_chr03_42330T/Pg_chr02_43670T/Pg_chr05_00850T	20
GO:0031327	biological_process	negative regulation of cellular biosynthetic process	11.0627	406/15055	8.65579e-12	8.13645e-10	6.05906e-10	Pg_chr02_23180T/Pg_contig00116_00020T/Pg_chr04_11970T/Pg_contig00116_05020T/Pg_chr02_05340T/Pg_contig00572_01490T/Pg_chr04_31330T/Pg_chr05_36750T/Pg_chr04_07910T/Pg_chr08_09980T/Pg_chr01_00580T/Pg_chr08_33140T/Pg_chr08_10730T/Pg_chr04_40200T/Pg_chr08_16380T/Pg_contig26001_00320T/Pg_chr04_04260T/Pg_chr03_42330T/Pg_chr02_43670T/Pg_chr05_00850T	20
GO:0009890	biological_process	negative regulation of biosynthetic process	10.8146	419/15055	1.53249e-11	1.20807e-09	8.99624e-10	Pg_chr02_23180T/Pg_contig00116_00020T/Pg_chr04_11970T/Pg_contig00116_05020T/Pg_chr02_05340T/Pg_contig00572_01490T/Pg_chr04_31330T/Pg_chr05_36750T/Pg_chr04_07910T/Pg_chr08_09980T/Pg_chr01_00580T/Pg_chr08_33140T/Pg_chr08_10730T/Pg_chr04_40200T/Pg_chr08_16380T/Pg_contig26001_00320T/Pg_chr04_04260T/Pg_chr03_42330T/Pg_chr02_43670T/Pg_chr05_00850T	20
GO:2000113	biological_process	negative regulation of cellular macromolecule biosynthetic process	10.7661	373/15055	1.71357e-11	1.20807e-09	8.99624e-10	Pg_chr02_23180T/Pg_contig00116_00020T/Pg_chr04_11970T/Pg_contig00116_05020T/Pg_chr02_05340T/Pg_chr04_31330T/Pg_chr05_36750T/Pg_chr04_07910T/Pg_chr08_09980T/Pg_chr01_00580T/Pg_chr08_33140T/Pg_chr08_10730T/Pg_chr04_40200T/Pg_chr08_16380T/Pg_contig26001_00320T/Pg_chr04_04260T/Pg_chr03_42330T/Pg_chr02_43670T/Pg_chr05_00850T	19
GO:0009723	biological_process	response to ethylene	9.96214	233/15055	1.09108e-10	6.83741e-09	5.09169e-09	Pg_chr09_15100T/Pg_chr02_53110T/Pg_chr07_18650T/Pg_chr05_35170T/Pg_chr02_31040T/Pg_chr02_21090T/Pg_contig00116_05020T/Pg_chr05_28610T/Pg_chr01_54740T/Pg_chr03_41930T/Pg_chr01_15040T/Pg_chr06_34330T/Pg_chr01_06760T/Pg_chr02_03150T/Pg_chr08_33140T	15
GO:1902679	biological_process	negative regulation of RNA biosynthetic process	9.24534	307/15055	5.68411e-10	2.9144e-08	2.17029e-08	Pg_chr02_23180T/Pg_contig00116_05020T/Pg_chr02_05340T/Pg_contig00572_01490T/Pg_chr04_07910T/Pg_chr08_09980T/Pg_chr01_00580T/Pg_chr08_33140T/Pg_chr08_10730T/Pg_chr04_40200T/Pg_chr08_16380T/Pg_contig26001_00320T/Pg_chr04_04260T/Pg_chr03_42330T/Pg_chr02_43670T/Pg_chr05_00850T	16
GO:1903507	biological_process	negative regulation of nucleic acid-templated transcription	9.24534	307/15055	5.68411e-10	2.9144e-08	2.17029e-08	Pg_chr02_23180T/Pg_contig00116_05020T/Pg_chr02_05340T/Pg_contig00572_01490T/Pg_chr04_07910T/Pg_chr08_09980T/Pg_chr01_00580T/Pg_chr08_33140T/Pg_chr08_10730T/Pg_chr04_40200T/Pg_chr08_16380T/Pg_contig26001_00320T/Pg_chr04_04260T/Pg_chr03_42330T/Pg_chr02_43670T/Pg_chr05_00850T	16
GO:0045892	biological_process	negative regulation of transcription, DNA-templated	8.72436	286/15055	1.88644e-09	8.86627e-08	6.60254e-08	Pg_chr02_23180T/Pg_contig00116_05020T/Pg_chr02_05340T/Pg_chr04_07910T/Pg_chr08_09980T/Pg_chr01_00580T/Pg_chr08_33140T/Pg_chr08_10730T/Pg_chr04_40200T/Pg_chr08_16380T/Pg_contig26001_00320T/Pg_chr04_04260T/Pg_chr03_42330T/Pg_chr02_43670T/Pg_chr05_00850T	15
GO:0051253	biological_process	negative regulation of RNA metabolic process	8.3516	354/15055	4.45042e-09	1.9308e-07	1.43783e-07	Pg_chr02_23180T/Pg_contig00116_05020T/Pg_chr02_05340T/Pg_contig00572_01490T/Pg_chr04_07910T/Pg_chr08_09980T/Pg_chr01_00580T/Pg_chr08_33140T/Pg_chr08_10730T/Pg_chr04_40200T/Pg_chr08_16380T/Pg_contig26001_00320T/Pg_chr04_04260T/Pg_chr03_42330T/Pg_chr02_43670T/Pg_chr05_00850T	16
GO:0000781	cellular_component	chromosome, telomeric region	2.89758	30/15055	0.00126595	0.0104999	0.00781909	Pg_chr01_18080T/Pg_chr06_34330T/Pg_chr02_03150T	3
GO:0044454	cellular_component	nuclear chromosome part	1.6532	223/15055	0.0222229	0.096413	0.0717969	Pg_chr08_09980T/Pg_chr01_18080T/Pg_chr06_34330T/Pg_chr02_03150T/Pg_chr06_26830T	5
GO:0000228	cellular_component	nuclear chromosome	1.54672	238/15055	0.0283976	0.114573	0.08532	Pg_chr08_09980T/Pg_chr01_18080T/Pg_chr06_34330T/Pg_chr02_03150T/Pg_chr06_26830T	5
GO:0098687	cellular_component	chromosomal region	1.4215	103/15055	0.0378879	0.140244	0.104437	Pg_chr01_18080T/Pg_chr06_34330T/Pg_chr02_03150T	3
GO:0005667	cellular_component	transcription factor complex	1.41099	104/15055	0.0388158	0.142157	0.105861	Pg_chr05_09390T/Pg_chr01_32410T/Pg_contig26001_00320T	3
GO:0032993	cellular_component	protein-DNA complex	1.30121	50/15055	0.0499792	0.170838	0.12722	Pg_chr01_18080T/Pg_chr06_34330T	2
GO:0042575	cellular_component	DNA polymerase complex	1.04875	13/15055	0.0893818	0.248332	0.184928	Pg_chr06_26830T	1
GO:0044427	cellular_component	chromosomal part	0.808045	396/15055	0.15558	0.331122	0.24658	Pg_chr08_09980T/Pg_chr01_18080T/Pg_chr06_34330T/Pg_chr02_03150T/Pg_chr06_26830T	5
GO:0005876	cellular_component	spindle microtubule	0.724481	29/15055	0.18859	0.371905	0.276951	Pg_chr08_09980T	1
GO:0017053	cellular_component	transcriptional repressor complex	0.724481	29/15055	0.18859	0.371905	0.276951	Pg_chr08_09980T	1
GO:0001067	molecular_function	regulatory region nucleic acid binding	13.9012	367/15055	1.25555e-14	2.36043e-12	1.75777e-12	Pg_chr06_28500T/Pg_chr06_07250T/Pg_chr01_36220T/Pg_chr06_04020T/Pg_contig00116_05020T/Pg_chr01_11940T/Pg_chr01_11920T/Pg_chr05_09390T/Pg_chr01_32410T/Pg_chr01_59180T/Pg_chr03_41930T/Pg_chr08_06240T/Pg_chr01_15040T/Pg_chr08_09980T/Pg_chr01_00580T/Pg_chr08_33140T/Pg_chr01_30950T/Pg_chr01_20200T/Pg_chr08_10730T/Pg_chr04_40200T/Pg_chr04_47650T/Pg_contig00116_02250T	22
GO:0000981	molecular_function	sequence-specific DNA binding RNA polymerase II transcription factor activity	12.2396	162/15055	5.75951e-13	8.12092e-11	6.04749e-11	Pg_chr06_28500T/Pg_chr06_07250T/Pg_chr07_04020T/Pg_chr02_45370T/Pg_chr05_09390T/Pg_chr01_32410T/Pg_chr03_41930T/Pg_chr08_06240T/Pg_chr01_15040T/Pg_chr08_09980T/Pg_chr01_00580T/Pg_chr01_30950T/Pg_chr04_40200T/Pg_chr04_37130T/Pg_chr05_39080T	15
GO:0001228	molecular_function	DNA-binding transcription activator activity, RNA polymerase II-specific	5.27923	62/15055	5.25742e-06	0.000164733	0.000122673	Pg_chr06_28500T/Pg_chr06_07250T/Pg_chr07_04020T/Pg_chr02_45370T/Pg_chr05_09390T/Pg_chr01_32410T	6
GO:0003690	molecular_function	double-stranded DNA binding	4.41838	285/15055	3.81615e-05	0.00079715	0.000593623	Pg_chr06_28500T/Pg_chr06_07250T/Pg_chr02_42230T/Pg_chr05_09390T/Pg_chr01_32410T/Pg_chr01_18080T/Pg_chr06_34330T/Pg_chr02_03150T/Pg_chr08_10730T/Pg_chr04_40200T	10
GO:0000989	molecular_function	transcription factor binding transcription factor activity	4.0632	101/15055	8.64577e-05	0.0016254	0.00121041	Pg_contig00429_00230T/Pg_chr03_41930T/Pg_chr08_06240T/Pg_chr01_15040T/Pg_chr01_00580T/Pg_chr01_30950T	6
GO:1990837	molecular_function	sequence-specific double-stranded DNA binding	3.85083	158/15055	0.000140985	0.00223737	0.00166613	Pg_chr06_28500T/Pg_chr06_07250T/Pg_chr02_42230T/Pg_chr05_09390T/Pg_chr01_32410T/Pg_chr08_10730T/Pg_chr04_40200T	7
GO:0003691	molecular_function	double-stranded telomeric DNA binding	3.81412	15/15055	0.000153418	0.00233859	0.0017415	Pg_chr01_18080T/Pg_chr06_34330T/Pg_chr02_03150T	3
GO:0000988	molecular_function	protein binding transcription factor activity	3.73142	116/15055	0.000185602	0.00271643	0.00202287	Pg_contig00429_00230T/Pg_chr03_41930T/Pg_chr08_06240T/Pg_chr01_15040T/Pg_chr01_00580T/Pg_chr01_30950T	6
GO:0001134	molecular_function	transcription factor recruiting transcription factor activity	3.56636	80/15055	0.000271417	0.00347908	0.0025908	Pg_chr03_41930T/Pg_chr08_06240T/Pg_chr01_15040T/Pg_chr01_00580T/Pg_chr01_30950T	5
GO:0001135	molecular_function	RNA polymerase II transcription factor recruiting transcription factor activity	3.56636	80/15055	0.000271417	0.00347908	0.0025908	Pg_chr03_41930T/Pg_chr08_06240T/Pg_chr01_15040T/Pg_chr01_00580T/Pg_chr01_30950T	5

## Sheet: ko_enrich
GO and KEGG enrichment analysis
ID	Description	BgRatio	pvalue	p.adjust	qvalue	geneID	Count
ko04075	Plant hormone signal transduction	367/9051	0.000239439	0.00143663	0.000504082	Pg_chr09_15100T/Pg_chr02_53110T/Pg_chr07_18650T/Pg_chr02_23180T/Pg_chr01_35980T/Pg_chr01_11970T	6
ko04712	Circadian rhythm - plant	45/9051	0.00572261	0.0206014	0.00722856	Pg_chr08_33140T/Pg_chr01_30950T	2
ko03410	Base excision repair	59/9051	0.0096794	0.0290382	0.0101888	Pg_chr06_26830T/Pg_chr06_31060T	2
ko03030	DNA replication	72/9051	0.0141736	0.0318906	0.0111897	Pg_chr06_26830T/Pg_chr06_31060T	2
ko03420	Nucleotide excision repair	88/9051	0.0207123	0.0414247	0.014535	Pg_chr06_26830T/Pg_chr06_31060T	2
ko04626	Plant-pathogen interaction	312/9051	0.0431447	0.0706003	0.024772	Pg_chr03_33670T/Pg_chr06_13950T/Pg_chr08_13650T	3
ko00240	Pyrimidine metabolism	195/9051	0.0869586	0.120404	0.0422471	Pg_chr06_26830T/Pg_chr06_31060T	2
ko00230	Purine metabolism	246/9051	0.128296	0.164952	0.057878	Pg_chr06_26830T/Pg_chr06_31060T	2
ko03040	Spliceosome	300/9051	0.539861	0.539861	0.189425	Pg_chr08_06240T	1
